# Supplementary material for: Proteomic analysis of mature and immature ejaculated spermatozoa from fertile men
Source: PubMed Central journal article supplement — Asian J Androl. 2015 Oct 27;18(5):735–46. doi: 10.4103/1008-682X.164924 (PMC5000797; doi:10.4103/1008-682x.164924), 2015-10-27
Supplement: AJA-18-735_Suppl1.pdf [file AJA-18-735_Suppl1.pdf]

**Supplementary Table 1: Proteins detected in four fractions of fertile men ejaculated semen**

| MW  | Average SC |       |       |       |
|-----|------------|-------|-------|-------|
|     | F1         | F2    | F3    | M     |
| 11  | 20.3       | 18.7  | 23.3  | 22.3  |
| 28  | 3.3        | 0.7   | 13.0  | 0.0   |
| 29  | 33.3       | 15.0  | 14.7  | 14.0  |
| 28  | 4.7        | 6.3   | 2.3   | 6.0   |
| 28  | 3.3        | 4.7   | 68.7  | 0.0   |
| 28  | 10.7       | 8.7   | 11.0  | 3.0   |
| 28  | 37.3       | 45.0  | 51.3  | 42.0  |
| 18  | 6.7        | 9.7   | 1.7   | 2.7   |
| 36  | 179.3      | 187.3 | 192.7 | 234.7 |
| 46  | 14.7       | 10.3  | 4.0   | 4.0   |
| 49  | 12.0       | 12.3  | 1.3   | 1.3   |
| 49  | 9.3        | 12.3  | 4.3   | 4.3   |
| 47  | 14.7       | 10.0  | 6.3   | 6.3   |
| 49  | 8.3        | 10.7  | 4.7   | 4.7   |
| 46  | 13.0       | 11.7  | 0.0   | 0.0   |
| 106 | 72.0       | 37.0  | 22.3  | 22.3  |
| 47  | 20.3       | 12.3  | 1.3   | 1.3   |
| 53  | 9.7        | 4.7   | 0.0   | 0.0   |
| 43  | 30.7       | 27.3  | 4.7   | 4.7   |
| 35  | 14.3       | 13.3  | 2.3   | 2.3   |
| 100 | 93.7       | 63.7  | 38.0  | 38.0  |
| 61  | 29.0       | 16.3  | 0.0   | 0.0   |
| 41  | 3.0        | 1.0   | 0.0   | 0.0   |
| 56  | 1.7        | 0.0   | 0.0   | 0.0   |
| 46  | 2.3        | 0.0   | 0.0   | 0.0   |
| 37  | 28.3       | 31.7  | 8.0   | 8.0   |
| 40  | 19.0       | 14.3  | 8.7   | 8.7   |
| 64  | 7.0        | 14.3  | 2.0   | 1.0   |
| 116 | 114.3      | 133.7 | 121.0 | 170.7 |
| 50  | 1.3        | 0.0   | 3.0   | 0.7   |
| 43  | 2.3        | 6.3   | 1.3   | 8.3   |
| 33  | 1.0        | 2.0   | 4.3   | 0.0   |
| 27  | 64.3       | 63.7  | 85.0  | 93.3  |
| 35  | 68.3       | 75.0  | 82.0  | 94.0  |
| 43  | 4.3        | 14.3  | 8.7   | 14.3  |
| 42  | 38.3       | 42.0  | 55.7  | 47.0  |
| 35  | 16.3       | 15.3  | 10.7  | 12.7  |
| 49  | 12.3       | 13.0  | 15.0  | 9.3   |
| 18  | 1.0        | 0.0   | 0.0   | 0.0   |
| 15  | 2.3        | 8.0   | 1.3   | 0.0   |
| 17  | 11.7       | 10.7  | 3.7   | 0.0   |
| 16  | 11.7       | 13.0  | 10.7  | 6.0   |
| 15  | 8.3        | 10.0  | 9.3   | 3.3   |
| 16  | 14.3       | 16.3  | 4.0   | 0.7   |
| 18  | 30.0       | 21.3  | 2.3   | 0.0   |
| 16  | 19.0       | 17.7  | 23.7  | 8.3   |
| 31  | 11.7       | 14.7  | 10.0  | 5.0   |
| 16  | 2.7        | 3.0   | 6.7   | 1.3   |
| 9   | 1.7        | 1.3   | 1.0   | 0.0   |
| 15  | 1.0        | 3.0   | 1.3   | 0.0   |
| 14  | 11.3       | 9.7   | 7.3   | 0.0   |
| 13  | 0          | 3.3   | 4.0   | 0.0   |
| 27  | 25.3       | 24.3  | 7.7   | 5.3   |
| 30  | 17.0       | 9.7   | 4.0   | 0.0   |
| 30  | 0          | 0.0   | 4.3   | 0.0   |

Contd....

**Supplementary Table 1: Contd...**

| MW  | Average SC |       |       |       |
|-----|------------|-------|-------|-------|
|     | F1         | F2    | F3    | M     |
| 23  | 8.0        | 10.0  | 4.0   | 0.7   |
| 29  | 7.3        | 7.7   | 1.0   | 0.0   |
| 22  | 12.3       | 8.0   | 10.0  | 0.0   |
| 24  | 15.3       | 14.3  | 11.0  | 0.0   |
| 23  | 23.0       | 25.3  | 3.3   | 4.0   |
| 33  | 31.0       | 30.7  | 19.3  | 3.3   |
| 68  | 5.0        | 0.0   | 1.7   | 0.0   |
| 56  | 49.7       | 53.3  | 50.3  | 55.3  |
| 137 | 2.0        | 0.0   | 0.0   | 3.3   |
| 61  | 293.0      | 264.7 | 309.7 | 247.0 |
| 34  | 35.3       | 45.7  | 36.0  | 19.0  |
| 12  | 5.0        | 8.0   | 4.3   | 4.0   |
| 12  | 14.0       | 14.3  | 14.0  | 7.7   |
| 25  | 1.0        | 0.7   | 0.0   | 0.0   |
| 25  | 8.3        | 6.3   | 2.7   | 1.3   |
| 20  | 8.0        | 9.3   | 5.7   | 3.7   |
| 18  | 23.3       | 26.0  | 11.7  | 10.7  |
| 24  | 22.7       | 18.7  | 5.7   | 0.0   |
| 24  | 2.3        | 0.0   | 0.0   | 0.0   |
| 23  | 6.3        | 8.0   | 0.0   | 0.0   |
| 24  | 6.3        | 7.0   | 10.3  | 0.0   |
| 22  | 14.3       | 15.0  | 12.7  | 10.0  |
| 21  | 10.0       | 8.0   | 0.0   | 0.0   |
| 23  | 14.7       | 13.7  | 2.0   | 0.7   |
| 19  | 7.7        | 5.7   | 0.0   | 0.0   |
| 15  | 8.0        | 9.0   | 6.0   | 2.0   |
| 15  | 5.0        | 7.3   | 0.7   | 2.7   |
| 18  | 0.0        | 1.3   | 0.0   | 0.0   |
| 18  | 4.3        | 2.7   | 0.7   | 0.0   |
| 17  | 7.7        | 3.7   | 0.0   | 0.0   |
| 16  | 2.0        | 2.0   | 0.0   | 0.0   |
| 17  | 4.7        | 9.7   | 4.0   | 0.0   |
| 16  | 1.7        | 0.0   | 0.0   | 0.0   |
| 46  | 2.7        | 0.0   | 6.0   | 0.0   |
| 13  | 6.0        | 3.3   | 2.3   | 0.0   |
| 14  | 3.3        | 3.3   | 0.0   | 0.0   |
| 15  | 2.7        | 2.3   | 1.3   | 0.0   |
| 13  | 0.7        | 0.0   | 0.0   | 0.0   |
| 12  | 9.3        | 4.7   | 0.0   | 0.0   |
| 8   | 0.0        | 3.7   | 0.0   | 0.0   |
| 48  | 5.3        | 7.3   | 4.0   | 0.0   |
| 34  | 7.0        | 7.3   | 3.0   | 0.0   |
| 33  | 23.7       | 14.7  | 10.3  | 0.0   |
| 29  | 13.7       | 18.7  | 14.7  | 4.0   |
| 30  | 18.7       | 13.7  | 7.7   | 0.0   |
| 28  | 3.0        | 0.0   | 0.0   | 0.0   |
| 22  | 5.7        | 5.0   | 7.7   | 0.0   |
| 86  | 41.3       | 48.0  | 17.3  | 20.0  |
| 53  | 25.7       | 44.7  | 28.3  | 6.0   |
| 72  | 416.7      | 463.7 | 438.7 | 360.3 |
| 105 | 0.7        | 0.0   | 0.0   | 0.0   |
| 34  | 56.7       | 56.7  | 63.3  | 83.7  |
| 63  | 8.0        | 5.3   | 1.0   | 1.3   |
| 33  | 0.0        | 0.0   | 0.0   | 6.3   |
| 45  | 256.3      | 262.3 | 265.3 | 300.3 |
| 45  | 4.7        | 2.0   | 0.0   | 0.0   |

Contd....

Supplementary Table 1: Contd...

| MW    | Average SC |       |       |       |
|-------|------------|-------|-------|-------|
|       | F1         | F2    | F3    | M     |
| 85    | 321.3      | 336.7 | 356.3 | 400.0 |
| 46    | 249.7      | 267.7 | 268.3 | 388.3 |
| 61    | 198.3      | 210.0 | 216.3 | 301.7 |
| 28    | 25.3       | 34.0  | 25.7  | 49.7  |
| 33    | 3.3        | 0.0   | 3.3   | 4.3   |
| 42    | 177.3      | 149.7 | 0.0   | 95.0  |
| 42    | 0.0        | 0.0   | 184.0 | 95.0  |
| 49    | 10.3       | 5.0   | 13.7  | 24.7  |
| 46    | 6.3        | 7.0   | 12.0  | 53.3  |
| 45    | 0.0        | 0.0   | 1.7   | 0.0   |
| 34    | 0.0        | 0.0   | 0.7   | 0.0   |
| 21    | 0.0        | 0.0   | 3.3   | 0.0   |
| 22    | 6.7        | 2.0   | 8.3   | 0.0   |
| 47    | 1.0        | 0.0   | 9.0   | 0.0   |
| 41    | 21.3       | 14.3  | 25.0  | 46.3  |
| 42    | 21.0       | 24.7  | 37.0  | 66.3  |
| 17    | 6.7        | 6.3   | 10.0  | 8.3   |
| 81    | 18.0       | 17.0  | 6.7   | 3.7   |
| 69    | 24.0       | 24.7  | 21.7  | 35.3  |
| 15    | 12.0       | 0.0   | 16.3  | 17.3  |
| 12    | 0.0        | 13.0  | 0.0   | 0.0   |
| 36    | 2.7        | 0.0   | 0.0   | 0.0   |
| 25    | 2.3        | 3.3   | 2.0   | 5.3   |
| 25    | 3.7        | 3.0   | 9.0   | 8.3   |
| 48.0  | 8.0        | 4.0   | 1.0   | 0.0   |
| 26.0  | 5.7        | 8.3   | 6.0   | 11.3  |
| 83.0  | 14.7       | 13.0  | 23.0  | 44.3  |
| 55.0  | 0.0        | 4.0   | 22.0  | 26.3  |
| 221.0 | 12.3       | 23.3  | 35.3  | 49.0  |
| 22.0  | 75.3       | 72.7  | 71.3  | 64.0  |
| 52.0  | 21.7       | 4.7   | 18.0  | 0.7   |
| 46.0  | 61.7       | 70.7  | 87.3  | 44.7  |
| 33    | 0.0        | 1.7   | 0.0   | 5.0   |
| 33    | 3.0        | 4.3   | 7.0   | 13.0  |
| 35    | 68.7       | 83.7  | 68.7  | 113.3 |
| 54    | 0.0        | 1.0   | 0.0   | 0.0   |
| 21    | 27.7       | 0.0   | 23.0  | 17.0  |
| 21    | 0.0        | 24.3  | 0.0   | 17.0  |
| 21    | 1.3        | 0.0   | 0.0   | 0.0   |
| 21    | 0.7        | 0.0   | 0.0   | 0.0   |
| 20    | 3.3        | 4.3   | 2.3   | 2.3   |
| 20    | 5.7        | 1.7   | 0.0   | 0.0   |
| 22    | 14.3       | 12.3  | 4.7   | 4.0   |
| 69    | 45.3       | 35.3  | 32.7  | 37.3  |
| 89    | 8.3        | 8.7   | 11.3  | 6.7   |
| 40    | 10.7       | 10.7  | 10.0  | 13.7  |
| 215   | 1.0        | 1.3   | 1.7   | 0.0   |
| 95    | 81.3       | 87.7  | 144.0 | 160.7 |
| 93    | 199.3      | 276.7 | 338.3 | 432.3 |
| 60    | 0.0        | 0.0   | 60.0  | 6.7   |
| 66    | 10.7       | 6.0   | 59.0  | 5.7   |
| 56    | 0.0        | 0.0   | 1.0   | 0.0   |
| 36    | 7.0        | 7.0   | 36.0  | 3.3   |
| 73    | 14.3       | 8.7   | 73.0  | 0.0   |
| 24    | 7.0        | 6.3   | 6.3   | 7.3   |
| 48    | 0.0        | 0.7   | 3.3   | 0.0   |

Contd....

Supplementary Table 1: Contd...

| MW  | Average SC |       |       |       |
|-----|------------|-------|-------|-------|
|     | F1         | F2    | F3    | M     |
| 47  | 4.0        | 0.0   | 2.3   | 0.0   |
| 54  | 40.7       | 36.3  | 47.0  | 44.7  |
| 39  | 8.0        | 4.7   | 10.3  | 6.7   |
| 161 | 0.0        | 0.0   | 2.3   | 0.0   |
| 103 | 8.0        | 6.7   | 0.0   | 0.0   |
| 105 | 61.3       | 36.3  | 40.7  | 6.0   |
| 102 | 10.7       | 6.3   | 4.0   | 14.0  |
| 43  | 23.0       | 26.0  | 23.3  | 9.7   |
| 47  | 237.3      | 261.0 | 341.0 | 300.0 |
| 116 | 21.0       | 24.3  | 2.0   | 16.7  |
| 131 | 9.0        | 11.7  | 0.0   | 0.0   |
| 33  | 9.0        | 3.7   | 4.7   | 7.3   |
| 37  | 2.7        | 0.0   | 0.0   | 0.0   |
| 35  | 7.3        | 11.7  | 1.7   | 0.0   |
| 110 | 229.0      | 137.7 | 85.3  | 34.7  |
| 90  | 0.0        | 0.0   | 0.0   | 1.7   |
| 150 | 207.7      | 212.3 | 164.3 | 132.3 |
| 53  | 1.3        | 0.0   | 2.7   | 1.0   |
| 30  | 3.3        | 3.7   | 3.3   | 0.0   |
| 87  | 0.0        | 0.7   | 0.0   | 0.0   |
| 39  | 38.7       | 32.3  | 58.0  | 11.3  |
| 39  | 28.7       | 30.0  | 63.0  | 3.3   |
| 36  | 9.7        | 18.7  | 23.0  | 6.0   |
| 36  | 7.7        | 14.7  | 10.0  | 1.3   |
| 36  | 53.0       | 55.7  | 28.0  | 33.7  |
| 37  | 0.0        | 0.0   | 1.3   | 0.0   |
| 20  | 15.7       | 12.7  | 4.3   | 1.3   |
| 14  | 3.7        | 2.0   | 1.3   | 5.7   |
| 104 | 19.7       | 14.7  | 0.0   | 0.0   |
| 101 | 0.0        | 0.0   | 7.0   | 0.0   |
| 91  | 5.3        | 3.7   | 0.0   | 0.0   |
| 108 | 0.0        | 1.0   | 0.0   | 0.0   |
| 104 | 8.0        | 10.0  | 3.0   | 1.7   |
| 105 | 2.3        | 1.7   | 0.0   | 0.0   |
| 31  | 9.7        | 5.0   | 1.3   | 3.3   |
| 32  | 8.3        | 8.3   | 8.0   | 9.3   |
| 11  | 2.3        | 1.7   | 2.7   | 4.7   |
| 45  | 3.7        | 0.0   | 0.0   | 0.0   |
| 11  | 0.0        | 5.3   | 1.3   | 6.0   |
| 21  | 2.7        | 0.0   | 0.0   | 0.0   |
| 22  | 16.3       | 20.3  | 24.0  | 26.3  |
| 67  | 38.7       | 47.0  | 62.3  | 31.7  |
| 28  | 1.7        | 2.0   | 0.0   | 2.0   |
| 37  | 0.0        | 0.0   | 0.0   | 5.0   |
| 76  | 22.7       | 12.3  | 0.0   | 0.0   |
| 42  | 3.7        | 4.0   | 0.0   | 0.0   |
| 75  | 7.7        | 4.0   | 1.3   | 0.0   |
| 96  | 18.3       | 11.3  | 18.0  | 23.0  |
| 116 | 4.7        | 5.3   | 9.0   | 13.3  |
| 38  | 2.0        | 1.3   | 0.0   | 5.7   |
| 54  | 12.3       | 15.3  | 18.7  | 16.3  |
| 46  | 41.3       | 47.0  | 45.3  | 21.7  |
| 48  | 76.0       | 74.0  | 104.7 | 83.7  |
| 53  | 22.3       | 24.7  | 27.7  | 18.0  |
| 57  | 6.7        | 5.7   | 1.0   | 0.0   |
| 74  | 3.3        | 4.7   | 0.0   | 8.0   |

Contd....

Supplementary Table 1: Contd...

| MW    | Average SC |       |       |       |
|-------|------------|-------|-------|-------|
|       | F1         | F2    | F3    | M     |
| 64    | 1.0        | 0.0   | 0.0   | 0.0   |
| 61    | 30.7       | 28.3  | 24.7  | 28.0  |
| 60    | 375.0      | 321.0 | 359.0 | 323.3 |
| 29    | 55.7       | 57.0  | 51.0  | 70.3  |
| 57    | 601.3      | 558.0 | 635.7 | 589.3 |
| 18    | 64.3       | 64.3  | 69.0  | 72.7  |
| 17    | 6.3        | 7.7   | 8.7   | 8.3   |
| 8     | 6.7        | 3.3   | 5.0   | 6.0   |
| 6     | 1.0        | 0.0   | 0.7   | 1.0   |
| 11    | 6.0        | 9.3   | 0.0   | 9.0   |
| 11    | 18.0       | 23.0  | 17.3  | 22.0  |
| 33    | 35.0       | 35.7  | 45.6  | 59.0  |
| 23    | 67.3       | 65.0  | 59.3  | 69.7  |
| 25    | 11.3       | 13.7  | 10.0  | 15.0  |
| 13    | 7.0        | 3.0   | 6.7   | 8.3   |
| 84    | 0.0        | 0.0   | 7.7   | 9.0   |
| 12    | 7.3        | 4.3   | 11.0  | 5.7   |
| 120   | 21.0       | 10.7  | 0.0   | 0.0   |
| 71    | 0.0        | 0.0   | 8.0   | 0.0   |
| 159   | 0.0        | 0.7   | 0.0   | 2.0   |
| 32    | 27.7       | 34.7  | 38.0  | 50.7  |
| 27    | 7.0        | 11.3  | 15.3  | 0.0   |
| 24.0  | 0.0        | 1.0   | 0.0   | 0.0   |
| 56.0  | 15.3       | 15.3  | 24.0  | 5.7   |
| 29.0  | 14.0       | 16.7  | 25.3  | 19.0  |
| 28.0  | 12.3       | 7.0   | 1.7   | 0.0   |
| 38.0  | 0.0        | 0.0   | 1.0   | 0.0   |
| 14.0  | 1.3        | 1.7   | 1.0   | 0.0   |
| 12.0  | 0.0        | 0.0   | 2.3   | 2.7   |
| 20.0  | 4.3        | 4.3   | 5.0   | 0.0   |
| 74.0  | 34.0       | 49.7  | 58.0  | 60.3  |
| 33.0  | 22.0       | 21.0  | 16.3  | 16.0  |
| 171.0 | 40.0       | 36.0  | 10.0  | 1.3   |
| 59.0  | 17.7       | 11.3  | 2.7   | 0.0   |
| 53.0  | 0.7        | 0.0   | 2.7   | 0.0   |
| 16.0  | 3.0        | 2.0   | 1.7   | 6.3   |
| 28.0  | 10.3       | 15.0  | 13.7  | 17.0  |
| 23.0  | 9.3        | 0.0   | 0.0   | 0.0   |
| 14.0  | 0.0        | 3.3   | 0.0   | 2.3   |
| 12.0  | 0.0        | 0.0   | 0.0   | 3.0   |
| 15.0  | 13.7       | 17.7  | 13.3  | 21.0  |
| 28.0  | 11.3       | 16.0  | 1.3   | 8.3   |
| 97    | 1          | 6.7   | 2.7   | 4     |
| 20    | 0          | 1.7   | 0     | 0     |
| 52.0  | 0.0        | 0.0   | 0.0   | 6.3   |
| 75.0  | 20.7       | 18.0  | 18.7  | 16.0  |
| 74.0  | 29.0       | 23.7  | 20.3  | 31.3  |
| 40.0  | 2.7        | 4.0   | 0.0   | 0.0   |
| 22.0  | 2.7        | 0.0   | 0.0   | 0.0   |
| 53.0  | 45.7       | 35.0  | 46.7  | 62.3  |
| 41.0  | 107.7      | 99.0  | 129.0 | 178.3 |
| 21.0  | 3.3        | 0.0   | 0.0   | 0.0   |
| 67.0  | 0.0        | 0.0   | 6.7   | 26.3  |
| 70.0  | 70.7       | 49.3  | 8.3   | 0.0   |
| 112.0 | 0.7        | 2.3   | 0.0   | 0.0   |
| 17.0  | 49.7       | 40.7  | 57.0  | 61.7  |

Contd....

Supplementary Table 1: Contd...

| MW    | Average SC |       |       |       |
|-------|------------|-------|-------|-------|
|       | F1         | F2    | F3    | M     |
| 68.0  | 98.0       | 91.7  | 59.7  | 38.3  |
| 28.0  | 3.0        | 2.0   | 0.0   | 0.0   |
| 82.0  | 0.0        | 3.3   | 5.3   | 0.0   |
| 48.0  | 125.7      | 140.3 | 116.3 | 64.7  |
| 40.0  | 26.3       | 32.3  | 28.0  | 32.7  |
| 40.0  | 1.3        | 0.0   | 0.0   | 0.7   |
| 43.0  | 62.7       | 55.0  | 45.7  | 32.7  |
| 46.0  | 66.7       | 69.7  | 56.3  | 57.7  |
| 79.0  | 1.0        | 0.0   | 0.0   | 12.3  |
| 35.0  | 0.0        | 1.0   | 0.0   | 1.0   |
| 29.0  | 12.3       | 14.7  | 20.3  | 10.7  |
| 35.0  | 20.3       | 23.0  | 19.7  | 17.0  |
| 30.0  | 0.0        | 0.0   | 11.0  | 0.0   |
| 153.0 | 42.7       | 41.3  | 48.7  | 64.3  |
| 74.0  | 47.7       | 33.3  | 19.0  | 3.0   |
| 58.0  | 1.3        | 0.0   | 0.0   | 0.0   |
| 71.0  | 54.7       | 51.3  | 57.0  | 58.0  |
| 88.0  | 1.3        | 12.3  | 9.7   | 8.3   |
| 74.0  | 109.0      | 115.0 | 178.0 | 120.7 |
| 39.0  | 1.0        | 2.3   | 0.0   | 8.7   |
| 49.0  | 0.0        | 0.0   | 0.0   | 4.0   |
| 45.0  | 16.7       | 23.3  | 42.3  | 34.7  |
| 25.0  | 5.0        | 8.0   | 10.3  | 16.7  |
| 28.0  | 0.0        | 0.0   | 7.3   | 0.0   |
| 100.0 | 0.0        | 0.0   | 1.3   | 0.0   |
| 85.0  | 0.0        | 0.0   | 3.0   | 0.0   |
| 46.0  | 8.3        | 13.0  | 9.7   | 11.7  |
| 20.0  | 70.7       | 69.0  | 77.0  | 46.3  |
| 45.0  | 6.0        | 3.7   | 5.7   | 0.0   |
| 53.0  | 5.7        | 4.7   | 8.3   | 12.0  |
| 31.0  | 3.3        | 3.7   | 1.3   | 1.0   |
| 46    | 22.0       | 5.3   | 2.3   | 0.0   |
| 14    | 32.0       | 31.3  | 32.7  | 29.0  |
| 26    | 1.3        | 0.0   | 0.0   | 0.0   |
| 26    | 9.0        | 11.3  | 7.0   | 10.7  |
| 25    | 4.0        | 3.7   | 3.3   | 6.3   |
| 12    | 35.3       | 29.3  | 26.0  | 30.3  |
| 15    | 1.7        | 4.3   | 0.0   | 0.0   |
| 49    | 2.3        | 4.7   | 2.0   | 0.0   |
| 21    | 4.7        | 1.3   | 21.0  | 1.7   |
| 16    | 0.0        | 0.0   | 10.7  | 0.0   |
| 20    | 0.0        | 0.0   | 4.7   | 2.3   |
| 45    | 17.0       | 22.0  | 14.0  | 4.3   |
| 27    | 1.0        | 0.0   | 8.7   | 0.0   |
| 27    | 0.0        | 0.0   | 3.7   | 0.0   |
| 65    | 4.7        | 12.0  | 13.7  | 18.0  |
| 82    | 2.0        | 7.0   | 6.7   | 17.7  |
| 37    | 11.7       | 8.0   | 7.0   | 12.3  |
| 52    | 155.7      | 156.0 | 174.3 | 162.3 |
| 192   | 97.0       | 117.3 | 125.7 | 49.7  |
| 24    | 2.0        | 0.0   | 0.0   | 0.0   |
| 76    | 0.0        | 0.0   | 0.0   | 5.7   |
| 52    | 175.3      | 167.3 | 192.3 | 127.7 |
| 12    | 11.0       | 9.0   | 14.3  | 11.3  |
| 57    | 1.3        | 0.0   | 0.0   | 0.0   |
| 34    | 2.3        | 0.0   | 0.0   | 0.0   |

Contd....

Supplementary Table 1: Contd...

| MW  | Average SC |       |       |       |
|-----|------------|-------|-------|-------|
|     | F1         | F2    | F3    | M     |
| 20  | 7.0        | 7.0   | 0.0   | 0.0   |
| 27  | 1.3        | 0.0   | 0.0   | 0.0   |
| 19  | 8.0        | 3.3   | 16.7  | 1.0   |
| 57  | 0.0        | 0.0   | 7.7   | 3.7   |
| 44  | 0.7        | 0.0   | 2.0   | 0.0   |
| 104 | 0.0        | 0.0   | 0.0   | 1.7   |
| 103 | 39.0       | 44.0  | 60.7  | 57.7  |
| 69  | 7.3        | 4.3   | 6.7   | 12.3  |
| 75  | 3.0        | 2.0   | 1.0   | 4.7   |
| 110 | 0.0        | 0.0   | 2.3   | 1.3   |
| 130 | 1.0        | 1.0   | 7.0   | 9.7   |
| 38  | 6.0        | 4.0   | 8.0   | 14.3  |
| 66  | 8.7        | 1.0   | 17.0  | 15.7  |
| 40  | 2.0        | 1.0   | 0.0   | 0.0   |
| 30  | 3.3        | 0.0   | 3.7   | 0.7   |
| 26  | 6.7        | 1.7   | 0.0   | 2.0   |
| 154 | 4.3        | 5.3   | 0.0   | 0.0   |
| 31  | 25.0       | 20.3  | 0.0   | 29.7  |
| 187 | 0.0        | 0.0   | 23.7  | 0.0   |
| 49  | 22.0       | 23.0  | 39.7  | 18.7  |
| 38  | 2.7        | 0.0   | 0.0   | 0.0   |
| 30  | 2.3        | 0.0   | 0.0   | 0.0   |
| 18  | 8.3        | 2.0   | 0.0   | 0.0   |
| 29  | 21.0       | 32.3  | 0.0   | 32.7  |
| 54  | 37.7       | 0.0   | 0.0   | 0.0   |
| 43  | 35.3       | 10.0  | 3.0   | 0.0   |
| 89  | 89.0       | 112.3 | 79.0  | 53.3  |
| 136 | 91.3       | 95.3  | 48.3  | 26.7  |
| 74  | 2.3        | 0.0   | 1.0   | 27.3  |
| 39  | 0.7        | 2.0   | 1.0   | 11.7  |
| 11  | 0.0        | 0.0   | 6.7   | 0.0   |
| 11  | 2.0        | 1.7   | 9.3   | 0.0   |
| 16  | 7.0        | 0.0   | 0.0   | 0.0   |
| 16  | 5.0        | 3.0   | 0.0   | 0.0   |
| 50  | 19.3       | 15.7  | 25.7  | 21.3  |
| 28  | 30.3       | 24.3  | 43.7  | 35.7  |
| 27  | 22.0       | 29.3  | 17.7  | 11.3  |
| 85  | 0.0        | 0.0   | 5.0   | 0.0   |
| 95  | 36.3       | 44.7  | 0.0   | 0.0   |
| 27  | 5.7        | 4.3   | 8.0   | 10.3  |
| 17  | 8.0        | 5.0   | 4.7   | 6.0   |
| 53  | 85.3       | 117.3 | 131.7 | 120.7 |
| 48  | 171.3      | 196.3 | 206.0 | 208.7 |
| 11  | 4.0        | 7.7   | 3.7   | 8.3   |
| 14  | 19.3       | 23.3  | 23.0  | 20.7  |
| 10  | 0.0        | 0.0   | 2.7   | 1.7   |
| 7   | 3.0        | 6.0   | 5.7   | 3.3   |
| 30  | 30.3       | 31.0  | 38.7  | 26.7  |
| 12  | 27.0       | 25.7  | 26.3  | 31.3  |
| 20  | 51.7       | 58.3  | 67.3  | 63.7  |
| 17  | 26.3       | 29.7  | 35.0  | 36.0  |
| 14  | 20.7       | 18.0  | 20.7  | 19.3  |
| 10  | 26.3       | 25.3  | 26.3  | 27.0  |
| 9   | 8.7        | 11.0  | 8.0   | 12.7  |
| 13  | 4.0        | 5.7   | 3.7   | 7.7   |
| 13  | 3.7        | 4.0   | 1.3   | 4.7   |

Contd....

Supplementary Table 1: Contd...

| MW  | Average SC |       |       |       |
|-----|------------|-------|-------|-------|
|     | F1         | F2    | F3    | M     |
| 26  | 48.0       | 42.7  | 76.3  | 52.0  |
| 35  | 58.3       | 62.3  | 61.7  | 72.7  |
| 98  | 2.3        | 0.7   | 0.0   | 0.0   |
| 532 | 34.3       | 5.7   | 1.7   | 0.0   |
| 71  | 1.3        | 0.0   | 0.0   | 0.0   |
| 57  | 3.7        | 0.0   | 0.0   | 0.0   |
| 66  | 12.0       | 7.0   | 7.0   | 0.0   |
| 56  | 212.7      | 224.3 | 272.0 | 256.0 |
| 67  | 0.0        | 0.0   | 0.0   | 2.0   |
| 53  | 12.3       | 2.3   | 1.0   | 0.0   |
| 92  | 0.0        | 0.0   | 1.3   | 0.0   |
| 57  | 0.0        | 0.0   | 9.7   | 0.0   |
| 43  | 2.3        | 1.7   | 0.0   | 0.0   |
| 38  | 2.0        | 0.0   | 0.0   | 0.0   |
| 30  | 1.3        | 1.7   | 0.0   | 0.0   |
| 39  | 0.0        | 3.0   | 1.7   | 1.3   |
| 13  | 8.3        | 11.0  | 2.7   | 4.0   |
| 28  | 1.3        | 1.3   | 0.0   | 0.0   |
| 38  | 37.7       | 22.3  | 4.0   | 0.0   |
| 35  | 1.0        | 0.0   | 0.0   | 0.0   |
| 36  | 107.3      | 96.7  | 134.0 | 125.3 |
| 62  | 9.7        | 6.7   | 10.0  | 8.0   |
| 36  | 2.0        | 0.0   | 0.0   | 0.0   |
| 32  | 22.3       | 22.3  | 12.7  | 30.0  |
| 27  | 16.0       | 21.3  | 13.7  | 12.0  |
| 94  | 0.0        | 0.0   | 2.3   | 0.0   |
| 93  | 0.0        | 0.0   | 13.0  | 0.0   |
| 114 | 0.0        | 0.0   | 27.3  | 0.0   |
| 332 | 1.0        | 0.0   | 217.0 | 1.3   |
| 27  | 27.3       | 29.0  | 33.0  | 26.7  |
| 24  | 0.0        | 0.0   | 0.0   | 2.0   |
| 54  | 145.3      | 146.7 | 163.3 | 158.0 |
| 69  | 87.7       | 104.3 | 106.3 | 126.0 |
| 49  | 26.0       | 29.3  | 45.3  | 30.7  |
| 43  | 2.0        | 2.7   | 1.3   | 1.0   |
| 26  | 4.3        | 0.0   | 0.7   | 0.0   |
| 77  | 11.3       | 6.3   | 0.0   | 1.3   |
| 46  | 11.0       | 10.7  | 16.3  | 9.3   |
| 53  | 0.0        | 0.0   | 0.7   | 0.0   |
| 56  | 88.0       | 103.0 | 87.0  | 61.3  |
| 54  | 7.3        | 11.3  | 0.0   | 1.0   |
| 88  | 17.0       | 10.7  | 0.0   | 0.0   |
| 93  | 0.0        | 0.7   | 0.0   | 5.3   |
| 89  | 18.7       | 23.3  | 27.7  | 41.7  |
| 88  | 14.3       | 17.7  | 14.0  | 23.3  |
| 127 | 3.7        | 3.3   | 0.0   | 2.0   |
| 174 | 1.7        | 0.0   | 0.0   | 0.0   |
| 46  | 19.7       | 18.3  | 16.3  | 10.3  |
| 52  | 0.0        | 0.0   | 2.3   | 1.0   |
| 48  | 22.3       | 0.0   | 21.7  | 20.0  |
| 38  | 15.0       | 15.0  | 13.3  | 12.3  |
| 41  | 16.0       | 21.0  | 11.7  | 2.7   |
| 36  | 12.7       | 15.3  | 20.7  | 26.7  |
| 36  | 0.0        | 0.0   | 0.0   | 1.7   |
| 27  | 3.3        | 0.0   | 0.0   | 1.7   |
| 26  | 9.0        | 12.3  | 9.7   | 6.7   |

Contd....

Supplementary Table 1: Contd...

| MW  | Average SC |       |       |       |
|-----|------------|-------|-------|-------|
|     | F1         | F2    | F3    | M     |
| 91  | 1.0        | 1.0   | 0.0   | 0.0   |
| 63  | 0.0        | 0.0   | 0.0   | 5.0   |
| 58  | 7.0        | 6.3   | 4.0   | 2.0   |
| 22  | 14.3       | 12.0  | 8.7   | 8.7   |
| 22  | 4.7        | 1.3   | 1.7   | 0.0   |
| 30  | 4.0        | 4.3   | 0.0   | 0.0   |
| 51  | 48.7       | 48.7  | 48.0  | 41.3  |
| 69  | 85.7       | 81.7  | 77.0  | 58.3  |
| 69  | 19.3       | 36.7  | 27.0  | 30.3  |
| 12  | 4.0        | 0.0   | 1.3   | 2.0   |
| 94  | 0.0        | 0.0   | 1.0   | 0.0   |
| 21  | 0.0        | 1.0   | 12.0  | 7.0   |
| 142 | 0.0        | 17.3  | 0.0   | 0.0   |
| 139 | 17.0       | 0.0   | 0.0   | 0.0   |
| 45  | 15.3       | 11.0  | 5.7   | 0.0   |
| 21  | 5.3        | 4.7   | 0.0   | 0.0   |
| 53  | 0.0        | 1.3   | 0.0   | 0.0   |
| 488 | 21.7       | 16.3  | 21.3  | 119.0 |
| 515 | 3.3        | 2.3   | 10.0  | 68.7  |
| 357 | 8.7        | 4.7   | 2.3   | 37.0  |
| 509 | 141.0      | 162.0 | 234.3 | 428.3 |
| 508 | 0.0        | 0.0   | 0.0   | 20.0  |
| 471 | 2.3        | 5.0   | 9.0   | 36.7  |
| 476 | 0.0        | 3.7   | 2.7   | 48.0  |
| 461 | 17.3       | 26.0  | 29.7  | 121.0 |
| 539 | 228.0      | 203.0 | 231.3 | 513.7 |
| 79  | 0.0        | 0.0   | 0.0   | 10.3  |
| 69  | 24.3       | 19.3  | 36.0  | 47.3  |
| 22  | 28.7       | 19.3  | 19.3  | 40.3  |
| 10  | 41.7       | 45.3  | 49.0  | 68.7  |
| 10  | 31.7       | 32.3  | 24.3  | 54.7  |
| 11  | 7.3        | 3.7   | 7.0   | 7.7   |
| 12  | 14.0       | 18.0  | 18.0  | 17.7  |
| 63  | 1.7        | 4.0   | 9.7   | 6.7   |
| 574 | 1.3        | 0.7   | 0.0   | 0.0   |
| 44  | 25.7       | 29.0  | 22.7  | 11.0  |
| 100 | 26.7       | 15.0  | 0.0   | 0.0   |
| 24  | 1.3        | 4.3   | 4.0   | 5.7   |
| 19  | 1.3        | 0.0   | 1.0   | 0.0   |
| 173 | 14.3       | 22.7  | 33.7  | 40.3  |
| 87  | 2.3        | 9.0   | 11.7  | 26.0  |
| 74  | 3.3        | 6.3   | 13.3  | 27.7  |
| 55  | 11.3       | 13.7  | 3.7   | 27.3  |
| 54  | 6.0        | 4.0   | 0.0   | 0.0   |
| 35  | 69.3       | 76.7  | 77.0  | 92.0  |
| 28  | 30.0       | 39.0  | 42.7  | 52.0  |
| 68  | 23.0       | 25.0  | 36.3  | 26.7  |
| 50  | 36.7       | 21.7  | 44.7  | 8.7   |
| 25  | 5.3        | 8.3   | 2.0   | 0.0   |
| 71  | 44.7       | 34.0  | 20.3  | 4.7   |
| 50  | 172.0      | 155.7 | 106.7 | 47.0  |
| 95  | 126.3      | 133.7 | 123.7 | 48.0  |
| 35  | 10.0       | 12.0  | 8.7   | 20.0  |
| 50  | 10.7       | 13.3  | 11.0  | 16.3  |
| 55  | 0.7        | 0.0   | 0.0   | 0.0   |
| 43  | 27.0       | 21.0  | 9.3   | 5.0   |

Contd....

Supplementary Table 1: Contd...

| MW  | Average SC |       |       |       |
|-----|------------|-------|-------|-------|
|     | F1         | F2    | F3    | M     |
| 52  | 7.7        | 13.0  | 6.0   | 9.3   |
| 29  | 22.3       | 19.3  | 15.3  | 13.0  |
| 47  | 36.7       | 41.0  | 28.3  | 14.0  |
| 33  | 6.0        | 1.3   | 0.0   | 0.0   |
| 44  | 15.7       | 21.7  | 17.0  | 3.0   |
| 92  | 520.3      | 544.0 | 424.0 | 321.3 |
| 29  | 1.3        | 19.3  | 0.0   | 0.0   |
| 33  | 28.7       | 29.0  | 31.7  | 31.3  |
| 44  | 33.3       | 43.0  | 39.7  | 50.3  |
| 31  | 62.7       | 69.7  | 86.7  | 96.7  |
| 232 | 0.0        | 0.0   | 13.0  | 0.0   |
| 17  | 12.0       | 11.7  | 4.3   | 9.0   |
| 18  | 1.3        | 1.7   | 1.3   | 0.0   |
| 26  | 54.0       | 57.7  | 60.3  | 26.3  |
| 31  | 15.3       | 18.7  | 15.3  | 18.0  |
| 556 | 0.0        | 0.0   | 99.0  | 2.3   |
| 53  | 3.0        | 1.3   | 0.0   | 0.0   |
| 63  | 1.3        | 0.0   | 0.0   | 0.0   |
| 39  | 17.3       | 12.7  | 19.0  | 10.3  |
| 38  | 53.7       | 57.0  | 47.0  | 47.0  |
| 54  | 0.0        | 0.0   | 7.0   | 0.0   |
| 54  | 8.3        | 7.7   | 3.0   | 0.0   |
| 32  | 2.7        | 3.3   | 0.0   | 0.0   |
| 28  | 36.3       | 35.7  | 32.3  | 48.3  |
| 29  | 4.0        | 3.7   | 0.0   | 0.0   |
| 27  | 5.7        | 4.7   | 6.0   | 8.7   |
| 46  | 6.0        | 0.0   | 15.0  | 0.0   |
| 20  | 6.3        | 7.0   | 0.0   | 0.0   |
| 16  | 0.0        | 0.0   | 6.0   | 0.0   |
| 167 | 10.0       | 9.7   | 1.0   | 0.0   |
| 38  | 3.3        | 1.3   | 0.0   | 0.0   |
| 25  | 0.7        | 0.0   | 0.0   | 0.0   |
| 43  | 2.7        | 0.0   | 0.0   | 0.0   |
| 20  | 0.0        | 0.0   | 5.3   | 0.0   |
| 27  | 7.7        | 8.0   | 10.0  | 2.7   |
| 123 | 11.0       | 8.0   | 0.0   | 0.0   |
| 110 | 25.7       | 18.7  | 1.3   | 1.3   |
| 124 | 45.7       | 45.7  | 1.3   | 69.3  |
| 61  | 8.0        | 0.0   | 0.0   | 0.0   |
| 69  | 6.3        | 0.0   | 13.3  | 0.0   |
| 33  | 14.3       | 14.0  | 15.3  | 4.0   |
| 33  | 6.3        | 2.7   | 0.0   | 0.0   |
| 35  | 0.0        | 0.0   | 0.0   | 2.7   |
| 31  | 26.3       | 25.0  | 26.0  | 23.7  |
| 157 | 0.0        | 0.0   | 0.0   | 0.7   |
| 102 | 6.3        | 0.0   | 4.0   | 16.0  |
| 273 | 25.0       | 0.0   | 5.0   | 0.0   |
| 53  | 0.0        | 1.3   | 0.0   | 0.0   |
| 15  | 15.0       | 21.7  | 18.3  | 6.7   |
| 63  | 47.3       | 61.0  | 69.7  | 50.0  |
| 21  | 12.0       | 10.7  | 3.3   | 5.0   |
| 20  | 1.0        | 1.3   | 0.0   | 0.0   |
| 28  | 65.7       | 63.3  | 80.3  | 79.0  |
| 36  | 9.0        | 10.7  | 15.0  | 17.7  |
| 259 | 115.7      | 127.3 | 84.7  | 64.0  |
| 36  | 4.0        | 3.7   | 9.3   | 8.7   |

Contd....

Supplementary Table 1: Contd...

| MW  | Average SC |       |       |       |
|-----|------------|-------|-------|-------|
|     | F1         | F2    | F3    | M     |
| 790 | 0.0        | 0.7   | 5.0   | 12.0  |
| 435 | 0.0        | 0.0   | 2.7   | 0.0   |
| 248 | 4.0        | 0.0   | 1.7   | 0.0   |
| 278 | 18.0       | 11.7  | 13.3  | 10.7  |
| 35  | 10.0       | 5.0   | 0.0   | 10.0  |
| 29  | 12.3       | 12.3  | 14.0  | 14.3  |
| 23  | 3.3        | 1.3   | 0.0   | 1.7   |
| 45  | 85.3       | 75.7  | 93.3  | 57.7  |
| 39  | 4.7        | 4.0   | 16.0  | 4.0   |
| 55  | 204.3      | 219.0 | 261.0 | 249.7 |
| 35  | 6.0        | 5.7   | 7.3   | 9.7   |
| 35  | 49.0       | 42.7  | 52.7  | 57.0  |
| 21  | 29.7       | 31.3  | 11.0  | 31.7  |
| 26  | 0.0        | 0.0   | 2.7   | 0.0   |
| 65  | 17.0       | 11.0  | 5.0   | 0.0   |
| 15  | 0.0        | 0.0   | 30.0  | 3.3   |
| 36  | 32.0       | 37.3  | 35.0  | 42.0  |
| 21  | 5.0        | 0.7   | 6.7   | 0.0   |
| 61  | 10.7       | 0.0   | 0.0   | 0.0   |
| 21  | 0.0        | 0.0   | 1.3   | 0.0   |
| 41  | 0.0        | 1.7   | 3.0   | 3.7   |
| 49  | 0.0        | 0.0   | 9.3   | 0.0   |
| 42  | 13.3       | 8.7   | 7.3   | 7.7   |
| 36  | 0.0        | 0.0   | 1.0   | 0.0   |
| 81  | 8.3        | 7.3   | 19.7  | 0.0   |
| 108 | 14.0       | 7.0   | 0.0   | 0.0   |
| 35  | 4.7        | 4.3   | 0.0   | 0.0   |
| 26  | 12.3       | 13.3  | 4.3   | 14.3  |
| 29  | 0.0        | 0.7   | 9.7   | 9.7   |
| 31  | 1.3        | 1.0   | 0.0   | 0.0   |
| 77  | 1.3        | 0.0   | 0.0   | 0.0   |
| 63  | 76.0       | 77.7  | 88.3  | 42.3  |
| 59  | 84.3       | 94.7  | 62.7  | 57.0  |
| 84  | 20.7       | 14.3  | 0.0   | 0.0   |
| 83  | 0.0        | 0.0   | 3.0   | 0.0   |
| 61  | 8.7        | 1.3   | 0.7   | 0.0   |
| 42  | 35.7       | 60.3  | 64.0  | 83.0  |
| 79  | 0.0        | 5.7   | 0.0   | 0.0   |
| 181 | 1.0        | 0.0   | 4.0   | 4.0   |
| 17  | 3.3        | 8.7   | 5.0   | 11.0  |
| 53  | 13.7       | 9.0   | 3.7   | 0.0   |
| 27  | 118.7      | 115.7 | 117.3 | 90.0  |
| 28  | 11.3       | 13.3  | 11.7  | 27.0  |
| 23  | 18.7       | 12.0  | 22.0  | 1.3   |
| 36  | 142.3      | 109.3 | 157.7 | 143.3 |
| 45  | 146.0      | 157.3 | 203.3 | 169.7 |
| 61  | 23.0       | 53.3  | 71.0  | 87.0  |
| 58  | 1.3        | 6.3   | 14.7  | 6.3   |
| 81  | 7.7        | 6.7   | 5.3   | 10.7  |
| 38  | 6.7        | 10.3  | 9.0   | 10.0  |
| 36  | 17.0       | 22.7  | 14.0  | 19.0  |
| 19  | 8.0        | 3.0   | 3.3   | 3.0   |
| 21  | 2.0        | 0.0   | 0.0   | 0.0   |
| 97  | 3.7        | 0.0   | 0.0   | 0.0   |
| 93  | 0.0        | 0.0   | 0.7   | 0.0   |
| 83  | 23.7       | 31.3  | 17.7  | 6.7   |

Contd....

Supplementary Table 1: Contd...

| MW  | Average SC |       |       |       |
|-----|------------|-------|-------|-------|
|     | F1         | F2    | F3    | M     |
| 36  | 10.7       | 11.0  | 6.0   | 15.0  |
| 62  | 0.7        | 0.0   | 0.7   | 0.0   |
| 63  | 1.7        | 0.0   | 0.0   | 0.0   |
| 62  | 1.7        | 6.7   | 9.3   | 0.0   |
| 136 | 6.3        | 10.3  | 4.7   | 4.7   |
| 110 | 3.3        | 0.0   | 0.0   | 0.0   |
| 75  | 0.0        | 11.0  | 0.0   | 0.0   |
| 56  | 0.0        | 0.0   | 0.0   | 0.7   |
| 37  | 0.0        | 0.0   | 0.0   | 6.3   |
| 24  | 3.3        | 1.7   | 3.3   | 4.3   |
| 24  | 21.0       | 18.0  | 6.0   | 14.0  |
| 22  | 5.7        | 3.3   | 3.3   | 3.0   |
| 37  | 3.3        | 0.0   | 0.0   | 0.0   |
| 35  | 29.3       | 39.7  | 21.7  | 14.3  |
| 71  | 0.0        | 0.0   | 0.0   | 1.3   |
| 29  | 0.0        | 2.7   | 0.0   | 0.0   |
| 45  | 131.7      | 133.7 | 122.7 | 149.0 |
| 38  | 7.0        | 2.0   | 7.3   | 8.0   |
| 23  | 14.7       | 17.0  | 0.0   | 1.3   |
| 181 | 13.7       | 7.3   | 0.0   | 0.0   |
| 146 | 7.0        | 2.0   | 3.7   | 8.3   |
| 70  | 95.0       | 73.3  | 71.0  | 52.3  |
| 70  | 169.0      | 192.7 | 221.3 | 171.0 |
| 94  | 22.3       | 19.3  | 11.0  | 10.7  |
| 95  | 86.7       | 91.0  | 46.3  | 42.7  |
| 71  | 44.7       | 41.7  | 85.3  | 37.7  |
| 97  | 11.0       | 5.7   | 0.7   | 0.0   |
| 80  | 23.7       | 20.3  | 35.0  | 29.7  |
| 23  | 32.7       | 17.0  | 42.0  | 0.0   |
| 98  | 566.7      | 610.0 | 500.3 | 341.7 |
| 83  | 85.0       | 76.0  | 62.7  | 21.7  |
| 70  | 552.7      | 574.0 | 604.7 | 545.0 |
| 33  | 0.0        | 0.0   | 7.3   | 0.0   |
| 36  | 24.0       | 11.7  | 0.7   | 4.0   |
| 16  | 13.0       | 13.0  | 11.3  | 16.3  |
| 52  | 64.3       | 58.7  | 65.3  | 77.0  |
| 39  | 0.0        | 0.0   | 1.7   | 0.0   |
| 40  | 0.0        | 0.0   | 1.3   | 0.0   |
| 49  | 0.0        | 0.0   | 6.0   | 0.0   |
| 51  | 0.0        | 0.0   | 8.7   | 0.0   |
| 91  | 0.0        | 0.0   | 3.7   | 0.0   |
| 37  | 0.0        | 0.0   | 1.0   | 0.0   |
| 32  | 0.0        | 0.0   | 5.3   | 0.0   |
| 103 | 307.0      | 384.7 | 464.3 | 610.7 |
| 22  | 8.7        | 14.0  | 5.0   | 5.0   |
| 73  | 0.0        | 0.0   | 9.0   | 0.0   |
| 14  | 0.0        | 1.0   | 0.0   | 0.0   |
| 17  | 15.0       | 11.3  | 15.7  | 15.7  |
| 20  | 10.0       | 13.3  | 6.0   | 14.7  |
| 22  | 0.0        | 4.7   | 7.3   | 0.0   |
| 23  | 0.0        | 0.0   | 4.7   | 0.0   |
| 22  | 27.0       | 31.3  | 30.0  | 15.7  |
| 14  | 20.7       | 17.0  | 0.0   | 19.7  |
| 14  | 0.0        | 0.0   | 1.3   | 0.7   |
| 14  | 8.0        | 10.0  | 0.0   | 9.7   |
| 15  | 0.0        | 0.0   | 39.3  | 19.7  |

Contd....

Supplementary Table 1: Contd...

| MW  | Average SC |       |       |       |
|-----|------------|-------|-------|-------|
|     | F1         | F2    | F3    | M     |
| 14  | 0.0        | 0.0   | 11.0  | 9.7   |
| 13  | 16.3       | 12.7  | 20.3  | 14.0  |
| 14  | 45.7       | 39.3  | 59.0  | 37.3  |
| 14  | 15.3       | 13.3  | 28.3  | 12.0  |
| 15  | 0.0        | 0.0   | 20.7  | 3.3   |
| 15  | 8.7        | 6.7   | 0.0   | 8.7   |
| 11  | 26.3       | 46.0  | 88.7  | 15.3  |
| 282 | 1.3        | 0.0   | 0.0   | 0.0   |
| 41  | 23.7       | 28.7  | 21.0  | 18.0  |
| 44  | 0.0        | 1.0   | 1.0   | 0.0   |
| 58  | 45.7       | 47.7  | 50.0  | 66.0  |
| 576 | 0.0        | 0.0   | 0.0   | 8.3   |
| 36  | 60.3       | 58.3  | 72.7  | 67.7  |
| 34  | 33.3       | 35.3  | 37.0  | 40.3  |
| 34  | 0.0        | 1.3   | 1.0   | 0.0   |
| 57  | 0.0        | 0.0   | 1.7   | 0.0   |
| 25  | 22.0       | 24.7  | 14.7  | 11.7  |
| 111 | 275.3      | 267.7 | 171.7 | 98.0  |
| 23  | 0.0        | 0.0   | 3.7   | 0.0   |
| 39  | 3.3        | 0.0   | 4.0   | 4.0   |
| 58  | 58.3       | 55.3  | 66.3  | 46.3  |
| 58  | 16.3       | 19.7  | 16.7  | 9.3   |
| 58  | 7.3        | 11.3  | 11.7  | 2.0   |
| 97  | 100.3      | 75.7  | 72.0  | 39.7  |
| 119 | 1.0        | 0.0   | 0.0   | 0.0   |
| 126 | 90.3       | 73.7  | 72.3  | 66.0  |
| 44  | 4.0        | 6.0   | 0.0   | 9.0   |
| 53  | 0.0        | 0.0   | 0.0   | 1.3   |
| 38  | 19.3       | 20.0  | 12.7  | 16.0  |
| 37  | 0.0        | 14.7  | 0.0   | 10.3  |
| 30  | 15.7       | 0.0   | 4.7   | 10.3  |
| 118 | 5.0        | 4.0   | 9.0   | 4.7   |
| 127 | 7.7        | 8.7   | 15.0  | 0.0   |
| 85  | 3.3        | 6.0   | 6.7   | 0.0   |
| 33  | 10.3       | 10.0  | 0.0   | 0.0   |
| 18  | 0.0        | 0.0   | 1.7   | 0.0   |
| 19  | 0.0        | 0.0   | 8.0   | 0.0   |
| 17  | 0.0        | 0.0   | 4.0   | 0.0   |
| 68  | 10.3       | 0.0   | 17.3  | 0.0   |
| 52  | 0.0        | 0.0   | 1.7   | 1.7   |
| 50  | 0.0        | 0.0   | 0.7   | 0.0   |
| 16  | 0.0        | 0.0   | 1.3   | 3.3   |
| 18  | 6.7        | 7.3   | 7.0   | 9.0   |
| 45  | 2.0        | 8.3   | 0.0   | 20.3  |
| 22  | 0.0        | 0.0   | 59.7  | 43.0  |
| 24  | 38.3       | 43.3  | 0.0   | 43.0  |
| 40  | 50.3       | 64.7  | 76.0  | 89.0  |
| 42  | 17.3       | 15.3  | 20.3  | 8.7   |
| 43  | 0.0        | 1.0   | 4.0   | 2.7   |
| 47  | 30.0       | 8.7   | 0.0   | 0.0   |
| 145 | 10.7       | 3.0   | 0.0   | 0.0   |
| 114 | 86.3       | 106.7 | 103.3 | 119.0 |
| 32  | 0.7        | 0.0   | 0.0   | 1.7   |
| 47  | 24.7       | 29.3  | 37.0  | 35.7  |
| 39  | 4.3        | 6.3   | 8.7   | 20.3  |
| 25  | 26.0       | 27.7  | 29.7  | 41.7  |

Contd....

Supplementary Table 1: Contd...

| MW  | Average SC |        |       |       |
|-----|------------|--------|-------|-------|
|     | F1         | F2     | F3    | M     |
| 24  | 0.0        | 143.3  | 220.7 | 0.0   |
| 27  | 132.3      | 0.0    | 0.0   | 196.7 |
| 82  | 0.0        | 0.0    | 61.7  | 0.0   |
| 150 | 22.7       | 20.3   | 0.0   | 0.0   |
| 110 | 0.0        | 0.0    | 1.0   | 0.0   |
| 13  | 0.7        | 0.0    | 0.0   | 0.0   |
| 10  | 8.3        | 7.7    | 10.7  | 6.0   |
| 43  | 32.3       | 26.7   | 37.3  | 15.3  |
| 78  | 919.3      | 1040.3 | 718.3 | 334.3 |
| 21  | 3.0        | 0.0    | 0.0   | 0.0   |
| 400 | 2.3        | 0.0    | 0.0   | 0.0   |
| 196 | 27.0       | 22.7   | 13.0  | 0.7   |
| 178 | 10.7       | 6.7    | 7.3   | 2.7   |
| 65  | 29.3       | 33.7   | 25.3  | 51.7  |
| 45  | 2.7        | 4.0    | 0.0   | 0.0   |
| 82  | 4.0        | 15.7   | 4.7   | 6.7   |
| 119 | 6.3        | 4.7    | 0.7   | 0.0   |
| 32  | 43.7       | 51.3   | 51.3  | 53.3  |
| 11  | 1.3        | 0.0    | 0.0   | 1.7   |
| 83  | 36.0       | 29.0   | 36.0  | 29.7  |
| 43  | 0.0        | 0.0    | 0.0   | 2.0   |
| 35  | 14.7       | 14.0   | 2.3   | 0.0   |
| 64  | 3.7        | 4.0    | 5.0   | 9.3   |
| 40  | 1.7        | 5.7    | 10.7  | 17.0  |
| 188 | 151.7      | 134.7  | 137.7 | 202.0 |
| 181 | 0.0        | 0.0    | 4.7   | 4.0   |
| 106 | 172.0      | 167.0  | 208.3 | 250.7 |
| 61  | 0.0        | 1.7    | 5.3   | 7.0   |
| 22  | 0.0        | 0.0    | 0.0   | 3.0   |
| 35  | 3.0        | 0.0    | 0.0   | 0.0   |
| 134 | 1.3        | 0.0    | 0.0   | 0.0   |
| 43  | 0.7        | 0.0    | 8.0   | 0.0   |
| 33  | 0.0        | 0.7    | 0.0   | 0.0   |
| 32  | 8.0        | 0.0    | 0.0   | 0.0   |
| 53  | 15.0       | 8.0    | 6.3   | 4.0   |
| 37  | 22.0       | 26.3   | 44.7  | 27.3  |
| 42  | 94.3       | 98.7   | 82.0  | 158.3 |
| 37  | 18.7       | 14.0   | 5.3   | 7.3   |
| 36  | 223.0      | 260.7  | 254.3 | 285.3 |
| 106 | 29.3       | 21.3   | 29.7  | 25.7  |
| 78  | 116.7      | 186.3  | 140.3 | 251.3 |
| 80  | 0.0        | 1.0    | 0.0   | 2.0   |
| 79  | 74.7       | 88.0   | 48.7  | 112.0 |
| 74  | 0.0        | 2.7    | 0.0   | 6.0   |
| 18  | 2.0        | 5.3    | 1.7   | 1.3   |
| 26  | 29.7       | 20.7   | 5.0   | 3.3   |
| 11  | 2.3        | 6.7    | 4.0   | 6.3   |
| 105 | 12.0       | 13.0   | 4.3   | 18.3  |
| 56  | 8.3        | 9.3    | 7.7   | 8.7   |
| 54  | 6.3        | 1.7    | 0.0   | 0.0   |
| 45  | 22.7       | 19.7   | 25.0  | 18.0  |
| 45  | 11.0       | 5.3    | 0.0   | 0.0   |
| 17  | 5.0        | 6.0    | 7.3   | 0.0   |
| 22  | 0.0        | 0.7    | 0.0   | 1.3   |
| 22  | 2.3        | 12.3   | 6.0   | 11.0  |
| 16  | 27.0       | 26.3   | 33.0  | 38.7  |

Contd....

Supplementary Table 1: Contd...

| MW  | Average SC |       |       |       |
|-----|------------|-------|-------|-------|
|     | F1         | F2    | F3    | M     |
| 17  | 15.3       | 15.3  | 22.0  | 21.3  |
| 71  | 25.7       | 31.3  | 24.3  | 13.3  |
| 12  | 5.3        | 7.7   | 0.0   | 0.0   |
| 38  | 1.0        | 0.7   | 7.3   | 0.0   |
| 28  | 4.0        | 5.3   | 0.0   | 5.3   |
| 99  | 0.7        | 0.0   | 0.0   | 0.0   |
| 39  | 18.3       | 0.0   | 18.7  | 19.0  |
| 36  | 0.0        | 26.7  | 0.0   | 19.0  |
| 36  | 316.0      | 314.3 | 361.0 | 360.7 |
| 32  | 16.7       | 16.7  | 10.3  | 14.0  |
| 55  | 0.0        | 1.3   | 1.3   | 2.0   |
| 43  | 0.0        | 0.0   | 0.0   | 2.3   |
| 92  | 58.7       | 50.7  | 35.0  | 30.3  |
| 107 | 3.7        | 0.0   | 0.0   | 0.0   |
| 78  | 0.7        | 0.7   | 4.7   | 0.0   |
| 312 | 3.7        | 0.0   | 0.0   | 0.0   |
| 47  | 92.3       | 96.0  | 110.3 | 104.7 |
| 214 | 7.0        | 11.0  | 0.0   | 0.0   |
| 43  | 3.3        | 4.7   | 7.7   | 7.7   |
| 89  | 21.7       | 18.0  | 22.3  | 36.0  |
| 22  | 14.0       | 11.7  | 7.3   | 4.3   |
| 26  | 21.3       | 26.7  | 23.7  | 16.7  |
| 21  | 27.7       | 45.3  | 13.0  | 14.0  |
| 23  | 7.3        | 0.0   | 0.0   | 0.0   |
| 24  | 20.0       | 8.7   | 0.0   | 7.0   |
| 51  | 11.0       | 7.7   | 9.7   | 8.7   |
| 30  | 8.3        | 11.7  | 6.7   | 8.0   |
| 101 | 12.3       | 4.7   | 0.7   | 0.0   |
| 61  | 2.0        | 1.7   | 1.0   | 1.0   |
| 47  | 0.0        | 0.0   | 0.0   | 1.0   |
| 83  | 5.0        | 2.3   | 4.7   | 3.0   |
| 37  | 1.3        | 0.0   | 0.0   | 0.0   |
| 16  | 5.3        | 3.7   | 2.7   | 3.7   |
| 20  | 7.3        | 3.3   | 6.0   | 8.7   |
| 61  | 14.0       | 6.3   | 11.7  | 7.3   |
| 34  | 10.0       | 11.0  | 3.3   | 33.3  |
| 33  | 0.0        | 0.0   | 0.0   | 1.0   |
| 33  | 17.0       | 15.3  | 0.0   | 0.0   |
| 31  | 0.0        | 20.0  | 7.7   | 29.3  |
| 17  | 8.0        | 7.3   | 6.3   | 4.0   |
| 38  | 0.0        | 1.0   | 0.0   | 0.0   |
| 51  | 0.0        | 0.0   | 0.0   | 1.0   |
| 50  | 6.7        | 9.3   | 6.3   | 13.0  |
| 10  | 0.0        | 1.0   | 2.0   | 3.7   |
| 16  | 0.7        | 0.0   | 0.0   | 0.0   |
| 16  | 16.7       | 7.3   | 1.3   | 6.3   |
| 35  | 4.0        | 0.0   | 0.0   | 0.0   |
| 38  | 11.3       | 14.0  | 0.0   | 13.0  |
| 20  | 3.0        | 2.3   | 0.0   | 5.3   |
| 84  | 53.7       | 57.0  | 0.0   | 63.0  |
| 36  | 0.0        | 0.0   | 0.0   | 5.3   |
| 58  | 16.3       | 20.0  | 26.0  | 13.7  |
| 54  | 6.7        | 9.3   | 8.0   | 5.0   |
| 37  | 0.7        | 0.0   | 0.0   | 1.0   |
| 54  | 0.0        | 0.0   | 0.0   | 1.3   |
| 28  | 0.0        | 0.0   | 0.0   | 1.0   |

Contd....

Supplementary Table 1: Contd...

| MW  | Average SC |      |       |       |
|-----|------------|------|-------|-------|
|     | F1         | F2   | F3    | M     |
| 19  | 0.0        | 0.0  | 0.0   | 0.7   |
| 41  | 14.7       | 25.0 | 33.0  | 30.3  |
| 47  | 17.3       | 15.3 | 10.0  | 0.7   |
| 28  | 0.0        | 7.3  | 7.7   | 0.0   |
| 31  | 10.7       | 5.3  | 14.0  | 16.0  |
| 35  | 0.0        | 0.0  | 0.0   | 0.7   |
| 84  | 51.0       | 69.7 | 121.3 | 12.7  |
| 233 | 7.0        | 0.0  | 0.0   | 0.0   |
| 17  | 12.0       | 5.3  | 10.0  | 0.0   |
| 20  | 21.7       | 8.3  | 7.3   | 0.0   |
| 227 | 37.3       | 23.3 | 56.0  | 0.0   |
| 149 | 2.7        | 0.0  | 0.0   | 0.0   |
| 37  | 0.0        | 2.3  | 0.0   | 0.0   |
| 84  | 10.3       | 15.0 | 1.7   | 13.7  |
| 42  | 0.0        | 4.0  | 1.7   | 0.0   |
| 62  | 0.7        | 3.7  | 0.0   | 2.7   |
| 46  | 0.0        | 0.0  | 0.7   | 0.0   |
| 49  | 7.0        | 10.3 | 4.0   | 18.7  |
| 44  | 0.0        | 0.0  | 0.0   | 1.3   |
| 33  | 0.0        | 0.0  | 1.7   | 2.0   |
| 65  | 99.0       | 96.3 | 115.0 | 84.0  |
| 20  | 8.7        | 15.7 | 9.0   | 15.0  |
| 20  | 1.0        | 1.0  | 0.0   | 0.0   |
| 41  | 7.0        | 5.7  | 7.0   | 7.0   |
| 15  | 0.0        | 4.0  | 0.0   | 5.0   |
| 17  | 3.3        | 6.3  | 7.7   | 6.0   |
| 17  | 8.3        | 7.0  | 6.0   | 5.0   |
| 11  | 6.7        | 7.3  | 2.3   | 8.3   |
| 9   | 0.0        | 4.0  | 1.3   | 4.3   |
| 13  | 9.3        | 9.7  | 8.0   | 15.3  |
| 18  | 1.0        | 1.7  | 0.0   | 0.0   |
| 13  | 1.3        | 0.0  | 0.0   | 0.0   |
| 20  | 13.0       | 11.7 | 11.0  | 15.3  |
| 43  | 29.7       | 30.0 | 31.0  | 36.3  |
| 21  | 26.0       | 25.3 | 22.0  | 20.3  |
| 18  | 3.0        | 0.0  | 0.0   | 1.7   |
| 11  | 0.0        | 2.7  | 0.0   | 1.7   |
| 15  | 6.7        | 7.7  | 6.3   | 6.0   |
| 16  | 3.3        | 1.3  | 0.7   | 2.0   |
| 22  | 8.0        | 8.3  | 6.0   | 6.7   |
| 22  | 9.3        | 10.0 | 7.3   | 14.7  |
| 51  | 27.3       | 29.3 | 36.0  | 28.3  |
| 27  | 16.0       | 13.3 | 16.3  | 20.7  |
| 53  | 20.3       | 16.7 | 29.7  | 14.3  |
| 30  | 31.3       | 31.0 | 24.7  | 29.7  |
| 20  | 1.7        | 4.0  | 0.0   | 3.3   |
| 13  | 8.0        | 8.0  | 6.7   | 7.3   |
| 14  | 0.0        | 0.0  | 1.0   | 3.7   |
| 24  | 11.3       | 7.3  | 3.3   | 5.0   |
| 24  | 11.0       | 8.7  | 8.7   | 13.0  |
| 31  | 22.3       | 30.0 | 18.3  | 15.0  |
| 32  | 24.0       | 27.3 | 23.7  | 28.3  |
| 81  | 58.3       | 91.7 | 102.3 | 103.3 |
| 64  | 3.0        | 2.7  | 2.3   | 0.0   |
| 77  | 14.7       | 27.7 | 21.3  | 12.0  |
| 132 | 22.3       | 27.0 | 18.0  | 26.7  |

Contd....



Supplementary Table 1: Contd...

| MW  | Average SC |       |       |       |
|-----|------------|-------|-------|-------|
|     | F1         | F2    | F3    | M     |
| 95  | 0.0        | 0.0   | 1.7   | 0.0   |
| 86  | 112.0      | 66.7  | 22.7  | 7.3   |
| 154 | 0.7        | 0.0   | 0.0   | 0.7   |
| 122 | 0.0        | 0.0   | 0.0   | 0.7   |
| 629 | 0.7        | 0.0   | 22.7  | 0.0   |
| 146 | 13.0       | 10.0  | 0.0   | 1.0   |
| 150 | 0.0        | 0.0   | 1.0   | 0.0   |
| 44  | 0.0        | 0.7   | 0.0   | 0.0   |
| 97  | 0.0        | 0.0   | 1.0   | 5.0   |
| 107 | 145.3      | 167.3 | 99.3  | 80.0  |
| 10  | 4.0        | 6.0   | 10.0  | 2.7   |
| 23  | 11.0       | 10.3  | 10.3  | 2.0   |
| 84  | 0.0        | 0.0   | 3.3   | 0.0   |
| 63  | 0.0        | 1.3   | 0.0   | 0.0   |
| 78  | 20.0       | 19.3  | 0.0   | 16.3  |
| 42  | 7.3        | 9.0   | 16.3  | 4.7   |
| 34  | 17.0       | 20.7  | 10.3  | 18.0  |
| 134 | 3.0        | 5.7   | 0.0   | 1.3   |
| 10  | 14.3       | 16.0  | 14.0  | 12.7  |
| 73  | 0.0        | 0.7   | 0.0   | 2.7   |
| 38  | 4.0        | 4.3   | 0.0   | 0.0   |
| 106 | 5.0        | 0.0   | 3.0   | 6.7   |
| 129 | 0.0        | 0.0   | 0.0   | 1.7   |
| 155 | 111.0      | 151.3 | 138.3 | 227.7 |
| 162 | 0.0        | 2.7   | 3.7   | 2.0   |
| 228 | 35.7       | 33.3  | 47.3  | 78.0  |
| 93  | 92.7       | 96.0  | 103.7 | 114.3 |
| 196 | 0.7        | 0.7   | 3.0   | 1.3   |
| 53  | 31.7       | 41.0  | 44.7  | 45.3  |
| 205 | 19.0       | 36.3  | 20.3  | 71.3  |
| 211 | 77.7       | 98.3  | 48.7  | 120.7 |
| 68  | 0.0        | 3.7   | 1.3   | 1.7   |
| 14  | 0.0        | 0.0   | 0.0   | 0.7   |
| 50  | 20.3       | 19.0  | 14.3  | 4.3   |
| 77  | 1.7        | 0.0   | 4.7   | 0.0   |
| 33  | 11.0       | 0.0   | 8.3   | 0.0   |
| 28  | 0.0        | 8.3   | 0.0   | 0.0   |
| 76  | 7.3        | 11.3  | 13.3  | 16.0  |
| 196 | 2.0        | 8.7   | 12.3  | 24.3  |
| 37  | 1.0        | 2.3   | 0.0   | 5.0   |
| 42  | 0.0        | 3.0   | 1.7   | 1.3   |
| 35  | 9.3        | 8.3   | 6.7   | 5.3   |
| 55  | 39.3       | 40.7  | 70.7  | 49.0  |
| 61  | 19.0       | 23.3  | 30.3  | 35.0  |
| 42  | 1.7        | 2.3   | 7.0   | 7.0   |
| 20  | 6.3        | 7.3   | 0.0   | 0.0   |
| 24  | 12.3       | 17.3  | 30.7  | 37.3  |
| 45  | 6.0        | 8.7   | 7.0   | 3.7   |
| 43  | 1.0        | 0.0   | 0.0   | 0.0   |
| 52  | 6.7        | 9.0   | 3.7   | 2.7   |
| 28  | 0.0        | 0.0   | 0.0   | 1.0   |
| 22  | 0.0        | 0.0   | 0.0   | 1.0   |
| 27  | 6.3        | 4.7   | 1.3   | 8.3   |
| 95  | 22.0       | 0.0   | 0.0   | 49.0  |
| 93  | 0.0        | 22.7  | 35.3  | 0.0   |
| 30  | 3.3        | 5.3   | 3.3   | 8.7   |

Contd....

Supplementary Table 1: Contd...

| MW  | Average SC |       |       |       |
|-----|------------|-------|-------|-------|
|     | F1         | F2    | F3    | M     |
| 29  | 22.0       | 33.0  | 30.7  | 27.3  |
| 18  | 9.0        | 4.0   | 16.0  | 0.0   |
| 24  | 28.0       | 27.0  | 17.0  | 12.7  |
| 22  | 11.0       | 9.3   | 6.0   | 15.7  |
| 16  | 14.7       | 10.3  | 1.0   | 1.7   |
| 16  | 9.7        | 9.7   | 0.0   | 0.0   |
| 52  | 0.7        | 0.0   | 0.0   | 0.0   |
| 35  | 6.3        | 8.0   | 9.0   | 17.0  |
| 47  | 13.0       | 13.3  | 1.0   | 0.0   |
| 205 | 0.0        | 0.0   | 16.3  | 0.0   |
| 22  | 35.0       | 28.0  | 15.0  | 12.7  |
| 22  | 21.3       | 15.0  | 6.3   | 2.0   |
| 31  | 55.7       | 55.0  | 47.7  | 34.3  |
| 22  | 65.3       | 49.7  | 69.7  | 56.7  |
| 25  | 43.3       | 33.0  | 26.0  | 6.7   |
| 39  | 2.3        | 5.0   | 0.0   | 0.0   |
| 28  | 10.3       | 11.3  | 2.3   | 0.0   |
| 27  | 13.3       | 19.3  | 9.0   | 3.0   |
| 41  | 0.0        | 0.7   | 0.0   | 0.0   |
| 80  | 12.0       | 11.3  | 5.7   | 1.3   |
| 116 | 0.7        | 0.0   | 0.0   | 1.0   |
| 58  | 0.0        | 0.7   | 0.0   | 0.0   |
| 66  | 3.7        | 4.0   | 0.0   | 0.0   |
| 40  | 8.3        | 14.7  | 14.7  | 23.3  |
| 21  | 23.3       | 18.7  | 11.3  | 12.3  |
| 67  | 0.0        | 1.0   | 1.7   | 2.7   |
| 32  | 1.3        | 1.7   | 2.3   | 6.7   |
| 32  | 0.0        | 0.0   | 0.0   | 0.7   |
| 71  | 0.0        | 0.0   | 3.7   | 0.0   |
| 61  | 2.0        | 0.0   | 0.0   | 0.0   |
| 68  | 0.0        | 0.0   | 3.0   | 0.0   |
| 45  | 6.0        | 8.3   | 13.3  | 0.0   |
| 45  | 170.0      | 201.3 | 165.0 | 123.0 |
| 29  | 11.7       | 12.0  | 12.3  | 4.7   |
| 29  | 47.0       | 50.3  | 41.3  | 33.0  |
| 34  | 4.0        | 5.7   | 1.7   | 5.7   |
| 16  | 13.0       | 11.7  | 9.3   | 3.3   |
| 27  | 38.3       | 38.3  | 18.3  | 34.0  |
| 83  | 0.0        | 0.0   | 28.0  | 0.0   |
| 87  | 0.0        | 0.0   | 5.7   | 0.0   |
| 129 | 43.0       | 52.3  | 58.3  | 113.3 |
| 55  | 10.0       | 6.7   | 8.7   | 20.7  |
| 46  | 31.3       | 20.7  | 18.0  | 7.0   |
| 70  | 27.3       | 13.3  | 1.0   | 0.0   |
| 71  | 0.0        | 0.0   | 7.3   | 0.0   |
| 514 | 0.0        | 0.0   | 16.7  | 0.0   |
| 50  | 2.3        | 0.0   | 0.0   | 0.0   |
| 54  | 0.0        | 0.0   | 0.0   | 1.7   |
| 39  | 1.3        | 3.7   | 0.0   | 0.0   |
| 37  | 0.0        | 1.3   | 0.0   | 0.0   |
| 71  | 21.7       | 0.0   | 10.7  | 0.0   |
| 73  | 0.0        | 3.3   | 0.0   | 0.0   |
| 59  | 0.0        | 0.0   | 5.3   | 0.0   |
| 86  | 13.0       | 23.3  | 15.3  | 22.0  |
| 32  | 7.0        | 6.7   | 0.0   | 8.3   |
| 19  | 1.7        | 0.7   | 0.0   | 0.0   |

Contd....

Supplementary Table 1: Contd...

| MW  | Average SC |       |       |       |
|-----|------------|-------|-------|-------|
|     | F1         | F2    | F3    | M     |
| 72  | 5.7        | 10.3  | 7.7   | 21.0  |
| 74  | 0.0        | 0.0   | 37.0  | 0.0   |
| 21  | 13.3       | 13.3  | 8.7   | 8.3   |
| 57  | 35.7       | 43.0  | 33.7  | 22.0  |
| 117 | 107.3      | 124.0 | 121.3 | 117.0 |
| 58  | 8.0        | 5.0   | 0.0   | 0.0   |
| 16  | 10.3       | 12.0  | 7.3   | 12.3  |
| 26  | 2.3        | 2.0   | 0.0   | 4.0   |
| 39  | 0.0        | 0.0   | 1.0   | 0.0   |
| 53  | 1.3        | 2.7   | 0.0   | 1.3   |
| 54  | 0.0        | 5.7   | 0.0   | 4.3   |
| 43  | 3.0        | 5.3   | 3.0   | 0.7   |
| 57  | 3.7        | 7.0   | 7.7   | 2.7   |
| 15  | 9.3        | 7.3   | 17.0  | 0.0   |
| 15  | 6.0        | 9.3   | 10.0  | 20.3  |
| 96  | 9.7        | 0.7   | 6.3   | 0.0   |
| 22  | 8.7        | 5.0   | 2.3   | 0.0   |
| 30  | 60.0       | 57.3  | 58.3  | 52.3  |
| 33  | 32.3       | 39.7  | 47.0  | 46.7  |
| 45  | 7.0        | 5.0   | 0.0   | 0.0   |
| 17  | 141.7      | 240.3 | 132.3 | 95.7  |
| 44  | 7.0        | 9.3   | 3.7   | 0.0   |
| 42  | 2.7        | 1.3   | 0.0   | 5.0   |
| 19  | 1.3        | 0.0   | 0.7   | 0.0   |
| 21  | 9.3        | 9.0   | 8.3   | 7.3   |
| 36  | 7.0        | 5.7   | 10.7  | 5.0   |
| 14  | 29.0       | 30.7  | 27.0  | 32.3  |
| 13  | 1.7        | 4.7   | 0.0   | 6.7   |
| 12  | 3.3        | 0.7   | 0.0   | 8.7   |
| 11  | 5.3        | 4.0   | 1.3   | 0.0   |
| 29  | 82.7       | 26.3  | 11.3  | 7.3   |
| 45  | 122.0      | 0.0   | 0.0   | 17.3  |
| 48  | 0.0        | 67.3  | 40.3  | 0.0   |
| 29  | 5.7        | 0.0   | 1.7   | 0.0   |
| 27  | 1.0        | 0.0   | 0.0   | 0.0   |
| 211 | 67.7       | 71.0  | 37.0  | 45.0  |
| 30  | 24.3       | 23.3  | 17.7  | 18.7  |
| 26  | 39.3       | 28.7  | 38.7  | 24.0  |
| 28  | 18.3       | 15.0  | 21.7  | 12.3  |
| 29  | 33.0       | 37.7  | 30.3  | 27.3  |
| 26  | 32.3       | 32.3  | 32.0  | 30.3  |
| 27  | 30.7       | 29.0  | 28.0  | 28.7  |
| 28  | 3.7        | 4.3   | 1.7   | 2.0   |
| 29  | 0.0        | 21.7  | 0.0   | 19.0  |
| 28  | 20.0       | 0.0   | 20.7  | 19.0  |
| 26  | 34.7       | 33.7  | 38.0  | 30.0  |
| 23  | 19.7       | 17.0  | 18.7  | 15.7  |
| 23  | 23.0       | 20.7  | 14.7  | 14.0  |
| 29  | 23.7       | 32.0  | 31.3  | 19.0  |
| 28  | 35.3       | 30.3  | 22.0  | 34.3  |
| 25  | 12.7       | 15.0  | 19.3  | 18.3  |
| 30  | 19.7       | 24.0  | 7.3   | 16.3  |
| 73  | 0.7        | 0.0   | 0.0   | 0.0   |
| 9   | 1.0        | 0.0   | 0.0   | 0.0   |
| 21  | 5.7        | 7.0   | 0.0   | 1.3   |
| 31  | 1.7        | 1.3   | 0.0   | 0.0   |

Contd....

Supplementary Table 1: Contd...

| MW  | Average SC |       |       |       |
|-----|------------|-------|-------|-------|
|     | F1         | F2    | F3    | M     |
| 21  | 1.3        | 0.0   | 0.0   | 4.3   |
| 57  | 305.7      | 329.7 | 277.0 | 151.3 |
| 73  | 93.0       | 134.0 | 76.7  | 44.3  |
| 48  | 76.3       | 68.3  | 68.0  | 43.0  |
| 57  | 97.0       | 90.3  | 115.0 | 28.7  |
| 20  | 29.0       | 28.7  | 19.7  | 21.0  |
| 23  | 14.0       | 17.3  | 7.7   | 8.3   |
| 87  | 21.0       | 34.7  | 23.0  | 60.0  |
| 11  | 0.0        | 0.0   | 0.0   | 1.3   |
| 93  | 4.3        | 0.0   | 0.0   | 1.0   |
| 58  | 20.0       | 19.3  | 5.7   | 0.0   |
| 55  | 0.0        | 0.0   | 0.7   | 1.3   |
| 17  | 9.3        | 11.7  | 10.0  | 14.7  |
| 36  | 1.3        | 4.0   | 5.3   | 8.3   |
| 148 | 0.0        | 0.0   | 1.3   | 5.7   |
| 13  | 1.3        | 0.0   | 0.0   | 0.0   |
| 25  | 0.7        | 0.0   | 0.0   | 0.0   |
| 63  | 4.3        | 5.7   | 5.0   | 33.3  |
| 65  | 24.7       | 21.3  | 29.3  | 73.0  |
| 27  | 0.7        | 0.0   | 0.0   | 0.0   |
| 100 | 8.7        | 6.3   | 10.7  | 25.0  |
| 41  | 0.0        | 0.0   | 1.3   | 0.0   |
| 41  | 0.0        | 0.0   | 0.0   | 3.0   |
| 31  | 7.7        | 5.7   | 11.0  | 11.3  |
| 34  | 0.0        | 0.0   | 1.3   | 0.0   |
| 28  | 42.3       | 46.7  | 38.3  | 46.7  |
| 42  | 31.3       | 32.3  | 24.0  | 17.7  |
| 51  | 0.7        | 0.0   | 2.3   | 0.0   |
| 68  | 0.0        | 0.0   | 15.0  | 0.0   |
| 47  | 0.7        | 0.7   | 0.0   | 0.0   |
| 13  | 0.0        | 0.0   | 0.0   | 4.0   |
| 12  | 8.7        | 3.3   | 12.3  | 0.0   |
| 11  | 0.0        | 0.0   | 14.0  | 0.0   |
| 11  | 12.3       | 11.7  | 54.3  | 2.3   |
| 13  | 16.0       | 13.7  | 67.0  | 5.7   |
| 36  | 0.0        | 2.0   | 0.0   | 1.7   |
| 89  | 24.7       | 16.0  | 10.3  | 5.3   |
| 31  | 0.0        | 0.0   | 2.3   | 0.0   |
| 77  | 0.0        | 0.0   | 25.0  | 0.0   |
| 90  | 0.0        | 0.0   | 9.3   | 0.0   |
| 10  | 2.3        | 5.3   | 0.0   | 0.0   |
| 30  | 25.7       | 28.7  | 0.0   | 35.7  |
| 23  | 14.3       | 7.7   | 0.0   | 13.0  |
| 32  | 0.0        | 0.0   | 18.0  | 0.0   |
| 103 | 60.0       | 60.3  | 42.7  | 49.0  |
| 25  | 11.0       | 10.7  | 10.7  | 12.7  |
| 16  | 0.7        | 0.0   | 0.0   | 0.7   |
| 38  | 15.0       | 18.3  | 14.3  | 21.7  |
| 48  | 7.0        | 0.0   | 0.0   | 14.7  |
| 44  | 0.0        | 6.0   | 7.0   | 0.0   |
| 43  | 58.3       | 84.7  | 74.3  | 103.3 |
| 39  | 116.0      | 106.3 | 118.7 | 143.7 |
| 99  | 3.0        | 0.7   | 0.0   | 2.3   |
| 51  | 14.7       | 17.7  | 20.7  | 19.7  |
| 66  | 165.0      | 152.0 | 228.0 | 285.3 |
| 35  | 9.0        | 12.7  | 6.7   | 10.7  |

Contd....

Supplementary Table 1: Contd...

| MW  | Average SC |       |       |       |
|-----|------------|-------|-------|-------|
|     | F1         | F2    | F3    | M     |
| 51  | 11.7       | 10.0  | 1.3   | 1.0   |
| 51  | 30.3       | 36.0  | 39.3  | 9.7   |
| 26  | 0.0        | 1.3   | 0.0   | 0.0   |
| 35  | 17.3       | 29.3  | 41.7  | 34.0  |
| 64  | 1.7        | 7.0   | 14.3  | 21.3  |
| 81  | 43.0       | 68.3  | 95.7  | 100.7 |
| 31  | 23.0       | 26.3  | 41.0  | 50.3  |
| 199 | 6.7        | 1.0   | 0.0   | 4.7   |
| 23  | 3.3        | 3.0   | 0.0   | 0.0   |
| 189 | 1.7        | 0.0   | 20.7  | 0.0   |
| 181 | 8.0        | 0.0   | 3.3   | 0.0   |
| 23  | 2.0        | 0.0   | 24.0  | 0.0   |
| 24  | 33.3       | 31.3  | 34.7  | 12.0  |
| 24  | 59.0       | 57.3  | 6.7   | 38.3  |
| 23  | 11.7       | 7.0   | 8.0   | 0.0   |
| 23  | 0.0        | 0.0   | 0.7   | 0.0   |
| 23  | 17.7       | 14.3  | 8.0   | 6.3   |
| 25  | 0.7        | 0.0   | 0.0   | 0.0   |
| 24  | 154.0      | 143.3 | 170.3 | 227.3 |
| 24  | 18.3       | 13.0  | 12.7  | 23.7  |
| 24  | 0.0        | 0.0   | 0.7   | 0.0   |
| 27  | 9.7        | 4.0   | 0.0   | 0.0   |
| 24  | 21.3       | 20.0  | 12.3  | 6.0   |
| 23  | 13.7       | 10.0  | 11.3  | 5.3   |
| 24  | 10.3       | 11.0  | 8.7   | 8.3   |
| 16  | 0.0        | 0.0   | 1.0   | 0.0   |
| 19  | 4.7        | 0.0   | 0.0   | 0.0   |
| 21  | 35.7       | 34.3  | 18.3  | 17.3  |
| 21  | 38.3       | 35.3  | 30.0  | 24.3  |
| 26  | 18.3       | 14.3  | 10.7  | 12.7  |
| 19  | 2.3        | 1.7   | 1.3   | 0.0   |
| 45  | 1.3        | 0.0   | 5.7   | 0.0   |
| 147 | 3.0        | 3.3   | 1.3   | 14.7  |
| 37  | 22.7       | 16.0  | 1.7   | 0.0   |
| 130 | 1.0        | 0.0   | 0.0   | 0.0   |
| 55  | 7.0        | 0.7   | 0.0   | 0.0   |
| 57  | 1.3        | 0.7   | 0.0   | 0.0   |
| 35  | 1.7        | 0.0   | 0.0   | 0.0   |
| 39  | 1.0        | 2.7   | 3.0   | 24.0  |
| 23  | 2.3        | 0.0   | 2.7   | 0.0   |
| 50  | 8.7        | 12.0  | 11.7  | 0.0   |
| 14  | 0.0        | 0.0   | 1.7   | 1.3   |
| 18  | 14.7       | 17.3  | 10.7  | 18.7  |
| 24  | 123.0      | 117.7 | 180.0 | 174.0 |
| 24  | 16.3       | 15.7  | 44.0  | 48.0  |
| 26  | 8.7        | 7.7   | 14.0  | 31.3  |
| 26  | 8.0        | 9.3   | 5.0   | 0.0   |
| 33  | 1.3        | 1.7   | 0.0   | 0.0   |
| 50  | 93.7       | 105.3 | 102.3 | 54.3  |
| 51  | 191.0      | 208.0 | 180.0 | 93.0  |
| 47  | 290.7      | 313.7 | 328.7 | 318.3 |
| 115 | 7.0        | 11.7  | 0.0   | 9.0   |
| 46  | 4.0        | 1.7   | 3.0   | 7.7   |
| 35  | 2.7        | 1.7   | 1.3   | 0.0   |
| 36  | 4.0        | 1.0   | 0.0   | 0.0   |
| 37  | 12.3       | 6.7   | 1.7   | 0.7   |

Contd....

Supplementary Table 1: Contd...

| MW  | Average SC |        |        |        |
|-----|------------|--------|--------|--------|
|     | F1         | F2     | F3     | M      |
| 38  | 1.0        | 0.0    | 0.0    | 0.0    |
| 22  | 2.0        | 4.7    | 0.0    | 0.0    |
| 52  | 196.7      | 168.3  | 143.7  | 101.0  |
| 65  | 408.0      | 361.7  | 252.0  | 168.3  |
| 53  | 0.0        | 0.0    | 0.0    | 3.3    |
| 50  | 0.0        | 0.0    | 0.0    | 3.3    |
| 41  | 0.0        | 0.0    | 6.0    | 10.3   |
| 53  | 0.0        | 0.0    | 4.7    | 17.0   |
| 51  | 1.3        | 1.7    | 9.3    | 25.3   |
| 39  | 7.0        | 6.7    | 4.7    | 5.0    |
| 27  | 5.7        | 8.7    | 3.3    | 5.3    |
| 49  | 8.7        | 9.7    | 7.7    | 1.3    |
| 9   | 0.0        | 12.7   | 7.7    | 15.0   |
| 36  | 0.0        | 0.0    | 0.0    | 13.7   |
| 79  | 0.0        | 1.0    | 0.0    | 0.0    |
| 65  | 7.7        | 7.0    | 8.7    | 0.7    |
| 41  | 0.0        | 13.7   | 0.0    | 4.7    |
| 37  | 15.3       | 0.0    | 0.0    | 4.7    |
| 33  | 0.0        | 0.0    | 11.3   | 4.7    |
| 36  | 16.0       | 9.3    | 4.0    | 4.0    |
| 58  | 6.0        | 5.0    | 5.3    | 1.0    |
| 107 | 2.3        | 2.3    | 0.0    | 0.0    |
| 39  | 8.7        | 8.7    | 0.0    | 1.0    |
| 113 | 6.7        | 12.3   | 0.0    | 3.3    |
| 97  | 0.7        | 0.0    | 0.0    | 0.0    |
| 32  | 8.7        | 9.0    | 9.0    | 7.7    |
| 37  | 0.0        | 0.0    | 0.0    | 2.7    |
| 39  | 35.0       | 43.7   | 43.0   | 63.0   |
| 76  | 28.0       | 41.3   | 30.7   | 57.7   |
| 77  | 7.3        | 25.3   | 18.3   | 4.0    |
| 46  | 0.0        | 0.0    | 7.0    | 0.0    |
| 45  | 0.0        | 0.0    | 142.7  | 10.0   |
| 45  | 0.0        | 0.0    | 64.3   | 13.0   |
| 42  | 0.0        | 0.0    | 16.3   | 0.0    |
| 43  | 90.7       | 79.0   | 54.0   | 60.0   |
| 69  | 2456.3     | 1911.7 | 2277.3 | 3515.0 |
| 25  | 39.7       | 41.0   | 48.0   | 44.7   |
| 58  | 0.0        | 1.0    | 5.0    | 2.0    |
| 31  | 4.7        | 9.3    | 0.7    | 2.0    |
| 47  | 0.7        | 3.0    | 7.7    | 10.3   |
| 44  | 86.7       | 100.3  | 111.3  | 126.0  |
| 21  | 28.0       | 25.3   | 24.3   | 21.7   |
| 25  | 54.7       | 62.7   | 43.3   | 56.7   |
| 20  | 17.3       | 18.0   | 22.7   | 16.0   |
| 30  | 3.7        | 2.0    | 1.7    | 0.0    |
| 88  | 0.0        | 0.0    | 11.0   | 0.0    |
| 17  | 42.7       | 41.7   | 64.3   | 45.7   |
| 14  | 6.3        | 3.3    | 4.3    | 0.0    |
| 18  | 12.7       | 0.0    | 0.0    | 0.0    |
| 8   | 1.3        | 2.0    | 0.0    | 0.0    |
| 113 | 10.3       | 8.7    | 0.0    | 20.0   |
| 110 | 0.0        | 0.0    | 6.3    | 20.0   |
| 112 | 13.3       | 13.3   | 14.3   | 38.0   |
| 114 | 45.3       | 59.0   | 49.0   | 126.7  |
| 35  | 0.0        | 0.0    | 0.0    | 0.7    |
| 32  | 30.7       | 20.7   | 46.3   | 49.0   |

Contd....

Supplementary Table 1: Contd...

| MW  | Average SC |       |       |       |
|-----|------------|-------|-------|-------|
|     | F1         | F2    | F3    | M     |
| 56  | 20.0       | 21.3  | 14.3  | 31.7  |
| 54  | 1.0        | 0.0   | 0.0   | 0.0   |
| 55  | 3.0        | 4.3   | 0.0   | 13.7  |
| 31  | 1.3        | 1.7   | 0.0   | 0.0   |
| 35  | 0.7        | 0.0   | 0.0   | 1.0   |
| 79  | 0.0        | 2.7   | 0.0   | 11.0  |
| 38  | 15.7       | 2.7   | 0.0   | 0.0   |
| 20  | 2.0        | 1.0   | 0.0   | 0.0   |
| 92  | 14.0       | 13.7  | 8.0   | 13.0  |
| 52  | 1.7        | 3.0   | 4.0   | 1.7   |
| 35  | 0.0        | 0.0   | 0.0   | 1.0   |
| 282 | 14.3       | 3.7   | 4.3   | 0.0   |
| 62  | 7.0        | 6.7   | 5.3   | 16.7  |
| 32  | 180.0      | 161.7 | 231.3 | 210.7 |
| 23  | 52.3       | 63.3  | 68.0  | 78.3  |
| 13  | 21.3       | 21.0  | 33.3  | 34.3  |
| 18  | 17.0       | 15.0  | 18.0  | 24.7  |
| 39  | 89.0       | 60.3  | 78.3  | 95.0  |
| 12  | 18.3       | 27.0  | 4.3   | 20.3  |
| 17  | 37.3       | 18.0  | 20.0  | 26.7  |
| 71  | 1.3        | 2.3   | 4.3   | 19.0  |
| 252 | 0.0        | 0.0   | 0.0   | 1.7   |
| 48  | 10.3       | 13.7  | 9.3   | 7.0   |
| 55  | 62.0       | 61.7  | 74.0  | 93.0  |
| 52  | 1.7        | 0.0   | 0.0   | 0.0   |
| 90  | 0.0        | 0.0   | 0.7   | 0.0   |
| 19  | 7.0        | 6.3   | 4.7   | 0.0   |
| 98  | 13.0       | 11.0  | 16.7  | 24.7  |
| 22  | 13.7       | 17.7  | 24.3  | 21.7  |
| 39  | 31.3       | 37.0  | 35.7  | 18.7  |
| 74  | 87.0       | 100.3 | 128.0 | 95.3  |
| 63  | 9.0        | 8.0   | 7.0   | 2.7   |
| 24  | 15.0       | 16.0  | 17.0  | 17.7  |
| 17  | 2.3        | 4.7   | 2.7   | 8.7   |
| 73  | 184.7      | 205.0 | 206.0 | 225.0 |
| 32  | 50.7       | 48.0  | 53.0  | 59.7  |
| 19  | 2.3        | 0.7   | 0.0   | 5.3   |
| 59  | 13.3       | 8.7   | 17.3  | 13.7  |
| 36  | 23.0       | 26.0  | 24.7  | 31.0  |
| 50  | 29.3       | 45.0  | 52.0  | 59.0  |
| 47  | 5.3        | 0.7   | 4.0   | 0.0   |
| 56  | 144.0      | 154.0 | 180.3 | 180.7 |
| 56  | 0.0        | 0.0   | 0.0   | 0.7   |
| 39  | 5.0        | 0.0   | 0.0   | 0.0   |
| 41  | 3.3        | 6.3   | 8.0   | 7.0   |
| 16  | 16.7       | 13.7  | 14.3  | 14.0  |
| 25  | 33.3       | 34.0  | 54.0  | 44.0  |
| 61  | 0.0        | 0.0   | 2.0   | 0.0   |
| 42  | 14.0       | 13.7  | 5.0   | 3.3   |
| 21  | 9.0        | 10.3  | 8.0   | 7.7   |
| 25  | 10.0       | 14.7  | 1.3   | 3.7   |
| 26  | 7.7        | 4.7   | 3.3   | 1.0   |
| 16  | 0.0        | 36.0  | 0.0   | 0.0   |
| 29  | 34.7       | 39.3  | 35.3  | 27.0  |
| 21  | 41.0       | 0.0   | 29.3  | 34.0  |
| 32  | 14.3       | 12.0  | 8.7   | 3.7   |

Contd....

Supplementary Table 1: Contd...

| MW  | Average SC |       |       |       |
|-----|------------|-------|-------|-------|
|     | F1         | F2    | F3    | M     |
| 60  | 80.3       | 82.3  | 43.3  | 35.0  |
| 57  | 188.0      | 175.0 | 142.3 | 73.0  |
| 58  | 110.7      | 100.3 | 78.0  | 56.7  |
| 60  | 70.3       | 65.7  | 59.3  | 35.3  |
| 59  | 139.0      | 144.3 | 127.7 | 79.0  |
| 61  | 100.0      | 86.3  | 81.3  | 47.0  |
| 60  | 141.7      | 137.0 | 107.7 | 63.0  |
| 58  | 68.7       | 54.7  | 44.0  | 17.0  |
| 58  | 41.7       | 46.7  | 35.7  | 21.7  |
| 56  | 0.0        | 0.0   | 1.3   | 0.0   |
| 77  | 0.0        | 0.0   | 0.0   | 1.0   |
| 50  | 43.0       | 52.3  | 71.7  | 84.0  |
| 57  | 87.3       | 96.0  | 130.0 | 168.0 |
| 241 | 13.3       | 8.3   | 3.3   | 2.0   |
| 109 | 0.0        | 0.0   | 0.0   | 1.3   |
| 29  | 32.0       | 27.7  | 39.0  | 21.3  |
| 35  | 2.7        | 4.3   | 0.0   | 0.0   |
| 28  | 12.0       | 12.3  | 10.7  | 16.0  |
| 23  | 1.7        | 0.7   | 0.0   | 1.3   |
| 26  | 1.0        | 7.0   | 0.0   | 4.0   |
| 26  | 0.0        | 0.0   | 0.7   | 0.7   |
| 126 | 0.0        | 0.0   | 1.3   | 7.7   |
| 77  | 19.7       | 14.3  | 16.7  | 36.0  |
| 19  | 0.7        | 0.0   | 0.0   | 0.0   |
| 14  | 0.0        | 0.7   | 0.0   | 0.0   |
| 60  | 9.3        | 9.0   | 6.0   | 0.0   |
| 67  | 33.7       | 32.3  | 39.0  | 67.7  |
| 12  | 0.0        | 0.0   | 2.0   | 0.0   |
| 9   | 6.3        | 1.7   | 0.0   | 0.0   |
| 60  | 0.7        | 1.3   | 0.0   | 0.0   |
| 57  | 11.7       | 6.7   | 0.0   | 15.0  |
| 26  | 7.3        | 4.3   | 4.0   | 8.0   |
| 32  | 6.0        | 5.0   | 0.0   | 0.0   |
| 39  | 40.0       | 38.7  | 39.0  | 30.3  |
| 83  | 2.7        | 1.7   | 0.7   | 0.0   |
| 31  | 0.0        | 0.0   | 0.0   | 0.7   |
| 29  | 0.0        | 1.3   | 0.0   | 0.0   |
| 50  | 0.0        | 0.0   | 25.0  | 0.0   |
| 54  | 6.7        | 7.7   | 4.3   | 6.0   |
| 66  | 4.3        | 1.7   | 1.0   | 0.0   |
| 20  | 1.3        | 0.0   | 0.0   | 0.0   |
| 40  | 1.0        | 4.3   | 1.3   | 2.7   |
| 38  | 9.3        | 14.3  | 3.7   | 5.0   |
| 12  | 7.0        | 10.0  | 2.7   | 6.7   |
| 18  | 4.0        | 5.3   | 2.0   | 0.0   |
| 29  | 30.7       | 32.0  | 36.7  | 53.7  |
| 35  | 0.0        | 0.0   | 1.3   | 0.0   |
| 50  | 3.0        | 0.7   | 0.0   | 0.0   |
| 22  | 0.0        | 0.0   | 10.3  | 0.0   |
| 89  | 195.3      | 203.3 | 220.0 | 182.7 |
| 68  | 0.0        | 0.0   | 7.7   | 0.0   |
| 20  | 0.0        | 0.0   | 2.7   | 0.0   |
| 26  | 21.3       | 28.3  | 20.3  | 9.0   |
| 77  | 0.7        | 0.0   | 1.3   | 2.3   |
| 33  | 11.7       | 12.7  | 5.0   | 0.7   |
| 88  | 5.0        | 0.7   | 0.0   | 0.0   |

Contd....

Supplementary Table 1: Contd...

| MW  | Average SC |       |       |       |
|-----|------------|-------|-------|-------|
|     | F1         | F2    | F3    | M     |
| 32  | 8.0        | 8.7   | 4.7   | 5.7   |
| 20  | 21.7       | 24.0  | 7.7   | 13.7  |
| 68  | 0.0        | 1.3   | 0.0   | 0.0   |
| 21  | 2.7        | 0.0   | 0.0   | 1.3   |
| 20  | 25.3       | 22.0  | 21.7  | 42.7  |
| 25  | 7.0        | 7.3   | 4.3   | 4.7   |
| 25  | 53.7       | 55.0  | 57.7  | 44.0  |
| 23  | 29.7       | 22.0  | 12.7  | 18.3  |
| 25  | 0.0        | 1.3   | 0.0   | 0.0   |
| 26  | 15.3       | 25.3  | 26.0  | 9.3   |
| 26  | 3.0        | 0.7   | 6.0   | 0.0   |
| 25  | 24.0       | 28.7  | 16.0  | 15.3  |
| 27  | 35.7       | 21.0  | 17.7  | 23.0  |
| 26  | 1.7        | 0.0   | 2.0   | 0.0   |
| 22  | 26.3       | 25.0  | 27.3  | 33.3  |
| 16  | 0.0        | 0.0   | 0.0   | 2.0   |
| 19  | 32.0       | 28.0  | 35.0  | 34.3  |
| 39  | 0.0        | 1.3   | 0.0   | 0.0   |
| 21  | 0.0        | 2.0   | 0.0   | 2.3   |
| 63  | 0.0        | 6.0   | 5.3   | 8.7   |
| 18  | 8.3        | 8.7   | 13.0  | 20.7  |
| 17  | 0.0        | 2.3   | 1.0   | 0.0   |
| 16  | 9.7        | 7.7   | 6.7   | 18.3  |
| 34  | 15.0       | 15.3  | 7.3   | 17.3  |
| 83  | 500.0      | 551.3 | 546.7 | 530.3 |
| 51  | 222.0      | 238.7 | 257.0 | 251.0 |
| 31  | 61.3       | 55.7  | 73.0  | 74.7  |
| 66  | 0.0        | 0.0   | 2.0   | 0.0   |
| 83  | 1.3        | 1.0   | 1.3   | 8.3   |
| 138 | 93.7       | 87.7  | 32.3  | 70.3  |
| 29  | 0.0        | 0.0   | 3.3   | 0.0   |
| 53  | 16.0       | 19.0  | 8.3   | 0.7   |
| 40  | 0.7        | 0.0   | 0.0   | 0.0   |
| 50  | 4.0        | 2.3   | 8.0   | 4.0   |
| 50  | 7.3        | 9.0   | 16.3  | 12.7  |
| 50  | 436.0      | 488.7 | 560.0 | 541.7 |
| 50  | 0.0        | 0.0   | 8.0   | 0.0   |
| 50  | 0.0        | 0.0   | 10.7  | 0.0   |
| 50  | 0.0        | 0.0   | 1.0   | 1.3   |
| 50  | 9.3        | 5.3   | 18.3  | 3.3   |
| 50  | 628.7      | 701.7 | 865.7 | 810.3 |
| 50  | 1.0        | 0.0   | 10.0  | 0.0   |
| 19  | 1.3        | 1.0   | 0.0   | 2.3   |
| 52  | 0.7        | 0.0   | 0.0   | 0.0   |
| 128 | 33.3       | 37.7  | 26.0  | 37.0  |
| 26  | 14.3       | 11.0  | 7.7   | 6.3   |
| 26  | 13.0       | 11.0  | 8.7   | 10.7  |
| 27  | 1.3        | 4.0   | 0.0   | 0.0   |
| 18  | 49.0       | 52.7  | 19.7  | 42.0  |
| 17  | 1.0        | 0.0   | 0.0   | 0.0   |
| 118 | 44.3       | 48.3  | 37.0  | 22.3  |
| 118 | 3.7        | 1.0   | 0.0   | 0.0   |
| 57  | 0.0        | 0.7   | 1.0   | 0.0   |
| 57  | 0.0        | 1.0   | 0.0   | 0.0   |
| 177 | 89.0       | 52.3  | 14.7  | 25.3  |
| 175 | 2.0        | 0.0   | 0.0   | 0.0   |

Contd....

Supplementary Table 1: Contd...

| MW  | Average SC |       |       |       |
|-----|------------|-------|-------|-------|
|     | F1         | F2    | F3    | M     |
| 63  | 0.7        | 0.0   | 1.7   | 2.3   |
| 67  | 0.7        | 0.0   | 0.0   | 0.0   |
| 17  | 4.7        | 0.7   | 0.0   | 0.0   |
| 34  | 0.0        | 0.0   | 0.0   | 5.3   |
| 63  | 0.0        | 0.0   | 0.0   | 2.3   |
| 24  | 7.3        | 3.7   | 1.7   | 6.3   |
| 37  | 145.3      | 95.0  | 112.3 | 100.3 |
| 20  | 9.3        | 10.7  | 8.7   | 9.7   |
| 19  | 4.0        | 5.3   | 5.7   | 15.0  |
| 119 | 6.0        | 0.7   | 1.0   | 6.0   |
| 25  | 4.3        | 1.0   | 0.7   | 2.3   |
| 42  | 2.0        | 0.0   | 0.0   | 2.3   |
| 34  | 9.7        | 7.3   | 7.7   | 14.0  |
| 62  | 0.0        | 0.0   | 0.0   | 0.7   |
| 41  | 15.7       | 21.7  | 19.7  | 35.0  |
| 24  | 14.3       | 10.0  | 15.7  | 19.7  |
| 29  | 0.0        | 0.0   | 0.0   | 4.3   |
| 104 | 0.0        | 0.0   | 0.0   | 1.0   |
| 36  | 0.0        | 1.0   | 3.0   | 1.0   |
| 197 | 0.0        | 0.0   | 0.7   | 0.0   |
| 19  | 11.3       | 17.0  | 20.7  | 47.0  |
| 21  | 0.0        | 0.0   | 0.0   | 0.7   |
| 147 | 21.0       | 28.3  | 44.3  | 112.7 |
| 69  | 24.3       | 24.0  | 10.7  | 0.0   |
| 21  | 0.0        | 1.3   | 3.0   | 6.3   |
| 42  | 5.0        | 1.0   | 6.7   | 2.7   |
| 23  | 16.0       | 12.3  | 25.3  | 26.7  |
| 19  | 8.7        | 6.7   | 1.0   | 0.0   |
| 18  | 0.0        | 1.0   | 0.0   | 0.0   |
| 24  | 7.7        | 7.7   | 6.3   | 9.7   |
| 11  | 4.3        | 6.3   | 3.0   | 1.0   |
| 6   | 5.7        | 1.3   | 5.7   | 0.0   |
| 57  | 0.0        | 0.0   | 14.3  | 4.7   |
| 56  | 15.7       | 16.7  | 0.0   | 4.7   |
| 41  | 0.0        | 0.0   | 1.3   | 0.0   |
| 356 | 0.0        | 2.3   | 0.0   | 3.7   |
| 33  | 0.0        | 0.0   | 0.0   | 1.0   |
| 140 | 165.7      | 141.0 | 28.0  | 1.7   |
| 70  | 90.3       | 108.0 | 144.7 | 109.0 |
| 11  | 45.0       | 43.3  | 38.7  | 28.3  |
| 16  | 0.0        | 1.3   | 0.0   | 0.0   |
| 33  | 47.7       | 39.7  | 34.0  | 43.3  |
| 83  | 19.7       | 18.7  | 6.0   | 2.0   |
| 25  | 16.3       | 8.7   | 4.3   | 0.0   |
| 40  | 59.7       | 67.0  | 61.3  | 35.3  |
| 54  | 1.7        | 1.0   | 0.0   | 0.0   |
| 117 | 2.3        | 0.0   | 0.0   | 0.0   |
| 20  | 0.0        | 0.7   | 0.0   | 0.0   |
| 31  | 5.3        | 2.3   | 4.3   | 0.0   |
| 33  | 23.7       | 21.0  | 9.7   | 3.0   |
| 31  | 21.7       | 15.0  | 4.7   | 4.3   |
| 129 | 26.0       | 25.3  | 27.3  | 31.7  |
| 32  | 4.7        | 1.3   | 0.0   | 1.3   |
| 68  | 20.7       | 3.0   | 3.3   | 0.7   |
| 57  | 12.0       | 2.0   | 0.0   | 0.0   |
| 40  | 3.7        | 1.3   | 0.0   | 0.0   |

Contd....

**Supplementary Table 1: Contd...**

| <i>MW</i> | <i>Average SC</i> |           |           |          |
|-----------|-------------------|-----------|-----------|----------|
|           | <i>F1</i>         | <i>F2</i> | <i>F3</i> | <i>M</i> |
| 14        | 1.0               | 0.0       | 0.0       | 0.0      |
| 28        | 29.7              | 29.0      | 29.0      | 36.3     |
| 214       | 0.0               | 0.7       | 5.7       | 15.0     |
| 34        | 0.0               | 0.0       | 0.0       | 1.3      |
| 103       | 0.0               | 0.0       | 0.0       | 1.7      |
| 149       | 0.0               | 0.0       | 6.3       | 10.3     |
| 192       | 0.0               | 0.7       | 0.0       | 12.0     |
| 75        | 2.0               | 0.0       | 0.0       | 0.0      |
| 39        | 2.0               | 0.0       | 0.0       | 0.0      |
| 42        | 0.0               | 0.0       | 0.0       | 6.7      |
| 55        | 0.0               | 0.0       | 0.0       | 1.3      |
| 34        | 24.3              | 7.7       | 2.3       | 7.0      |
| 40        | 188.3             | 209.3     | 270.7     | 348.7    |
| 39        | 13.0              | 20.3      | 17.7      | 24.3     |

MW: molecular weight; SC: spectral count
